# Supplementary material
Source: PubMed Central journal article supplement (PMC6309857)

## Image Pair 1

Cannabis Image

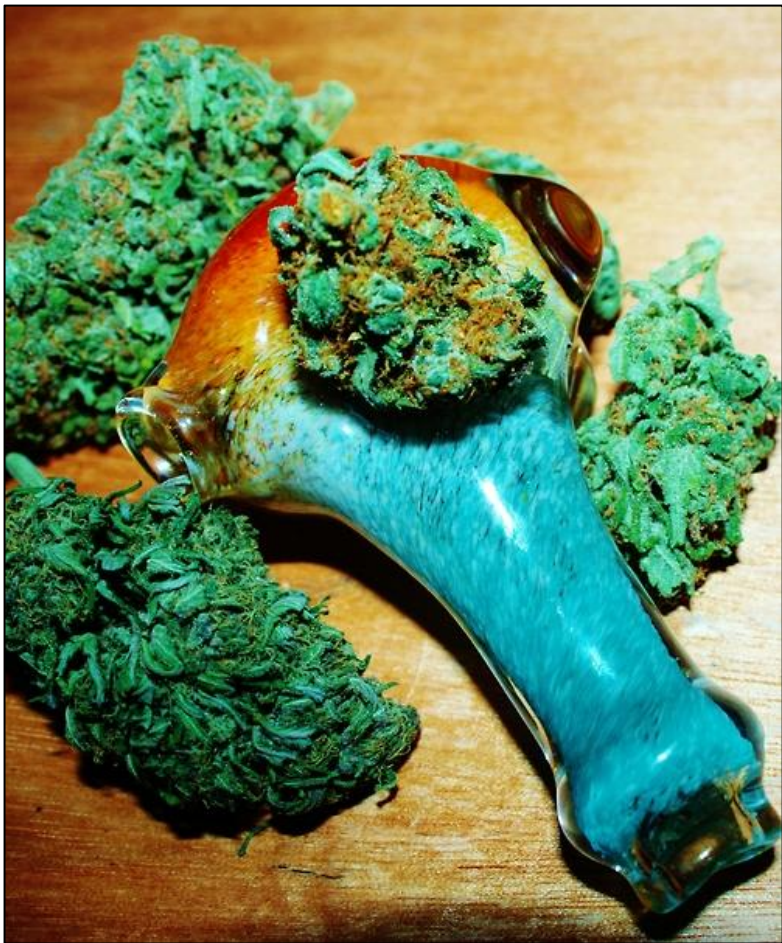

Control Image

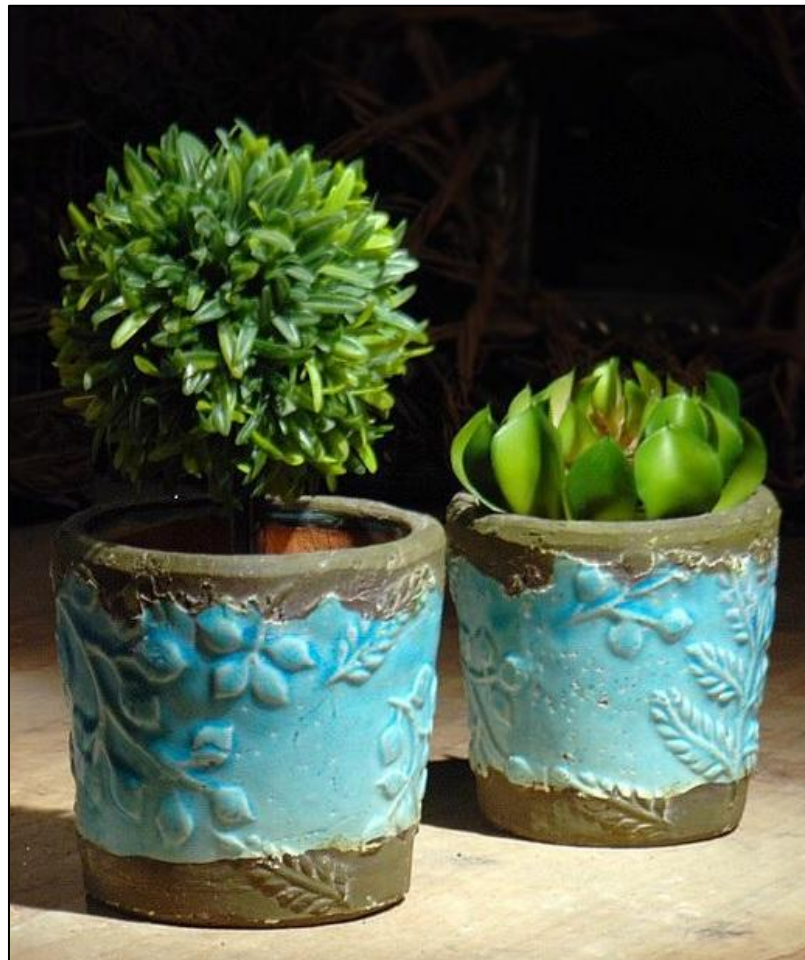

## Image Pair 2

Cannabis Image

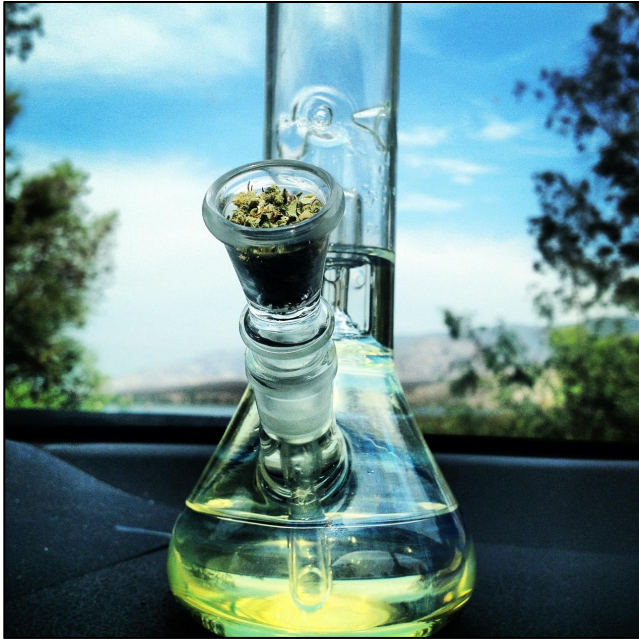

Control Image

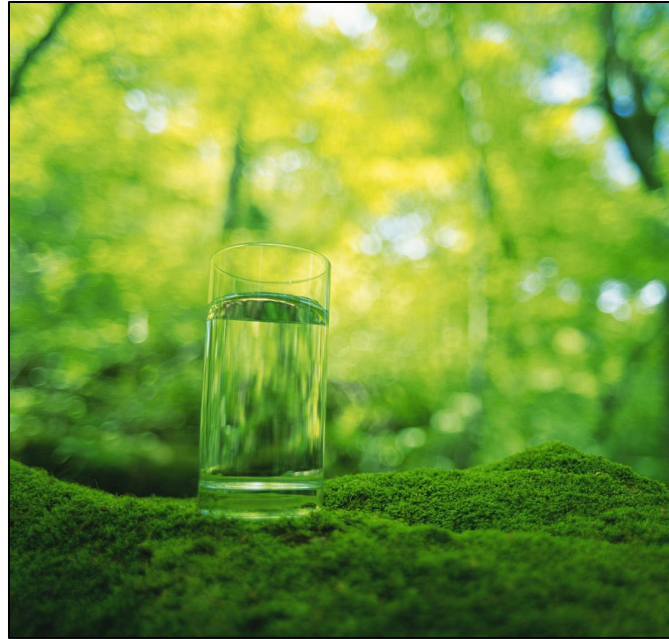

### Image Pair 3

Cannabis Image

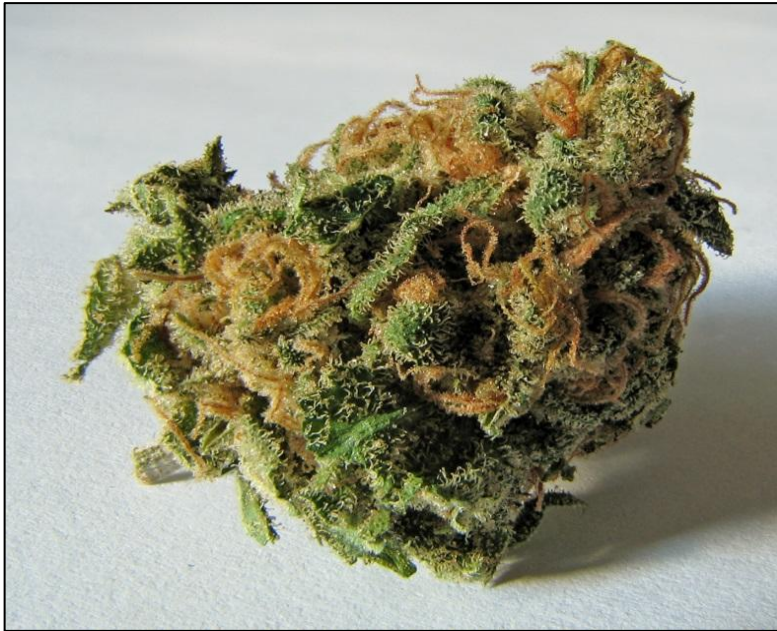

Control Image

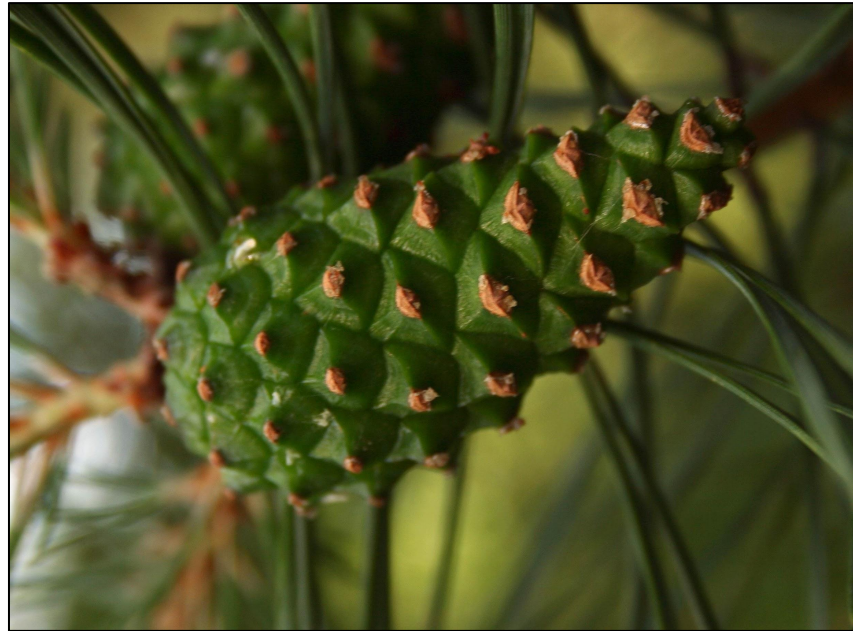

## Image Pair 4

Cannabis Image

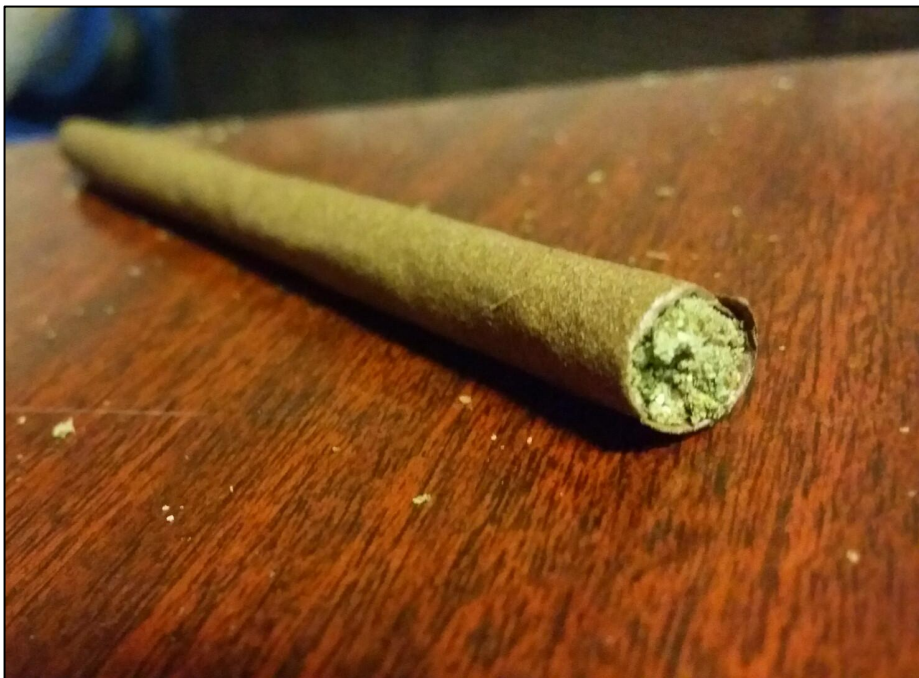

Control Image

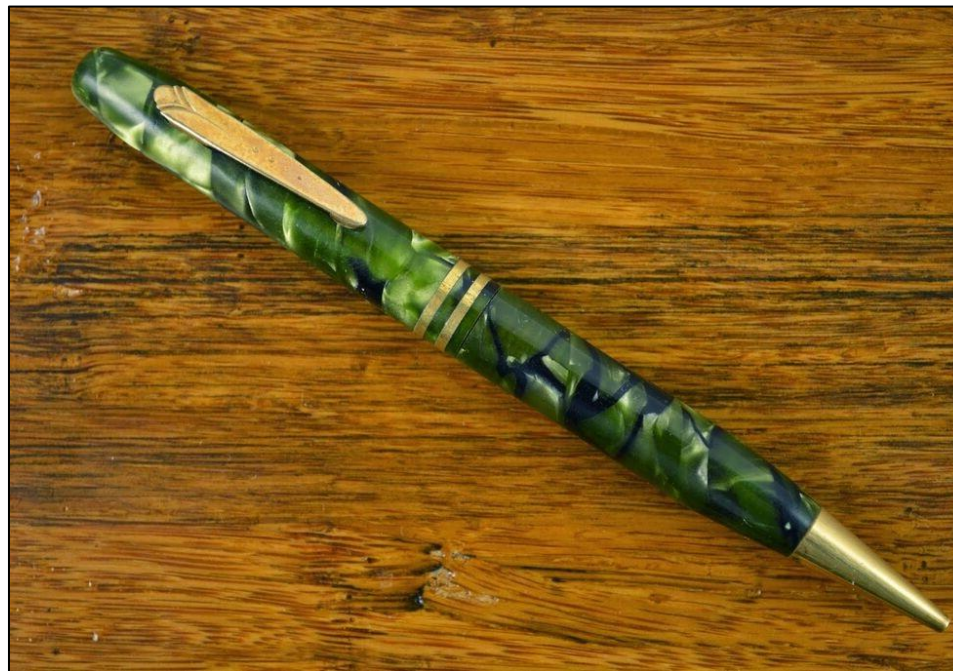

## Image Pair 5

Cannabis Image

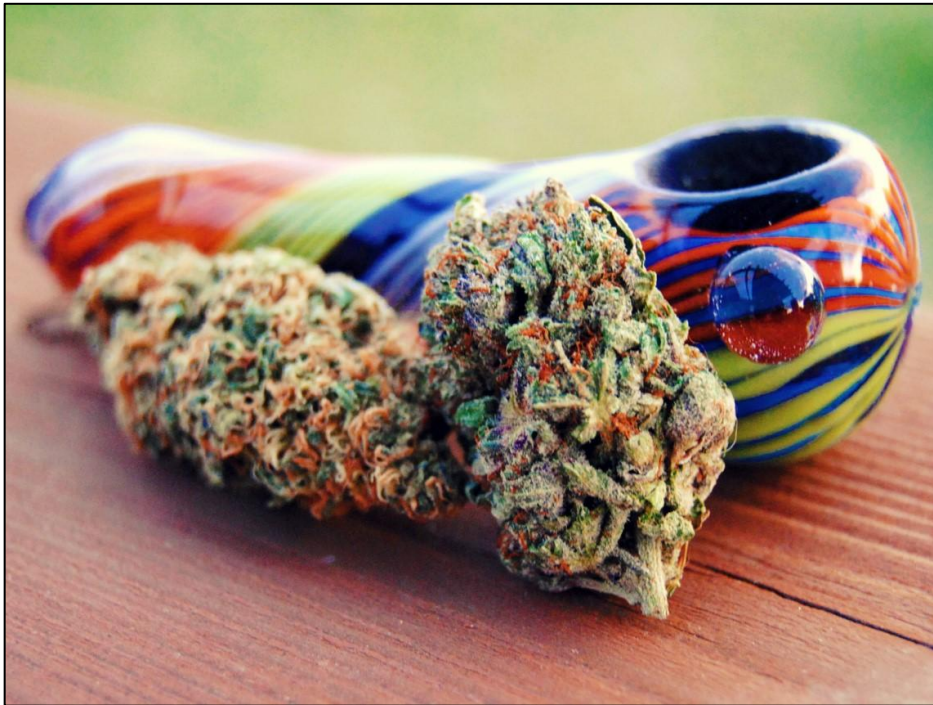

Control Image

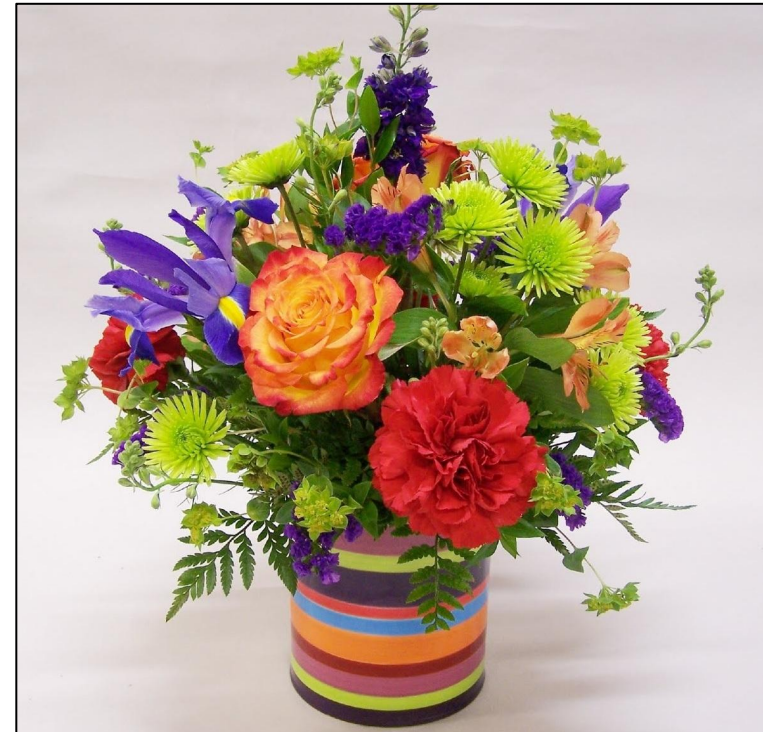

## Image Pair 6

Cannabis Image

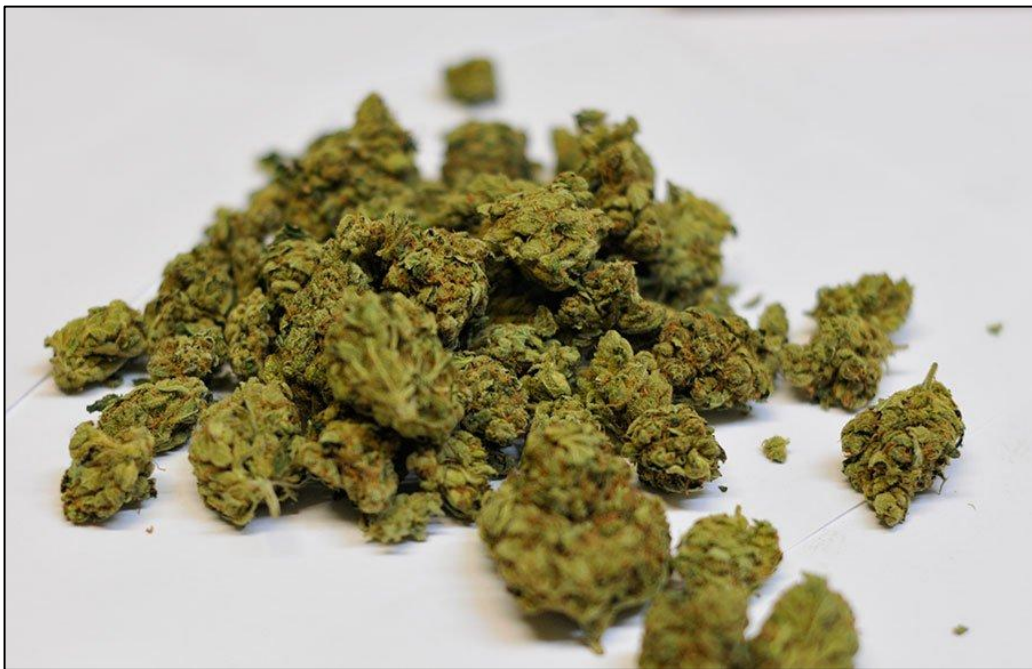

Control Image

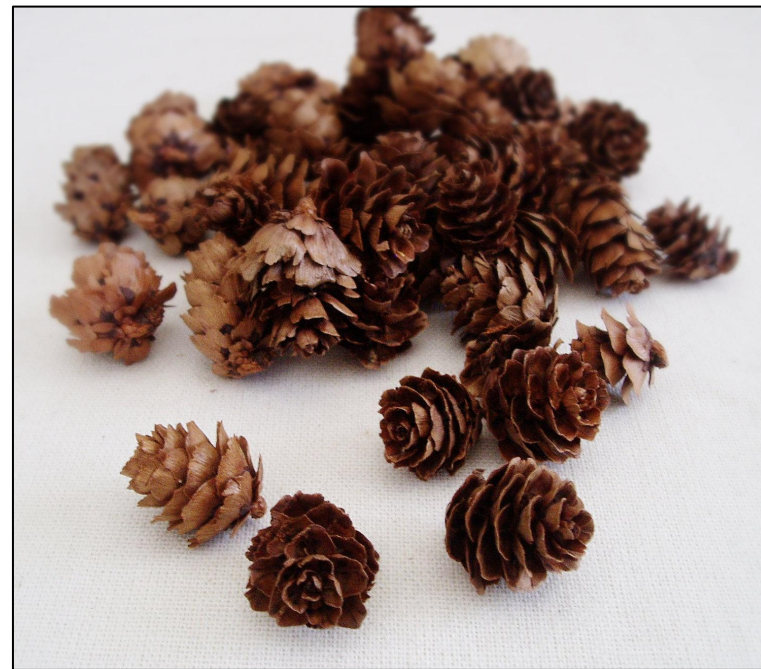

## Image Pair 7

Cannabis Image

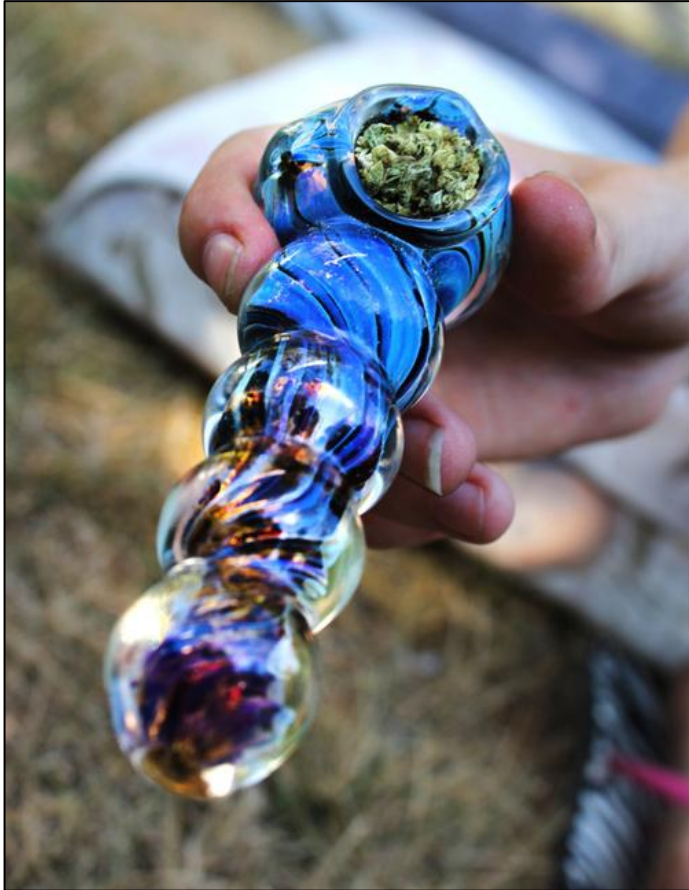

Control Image

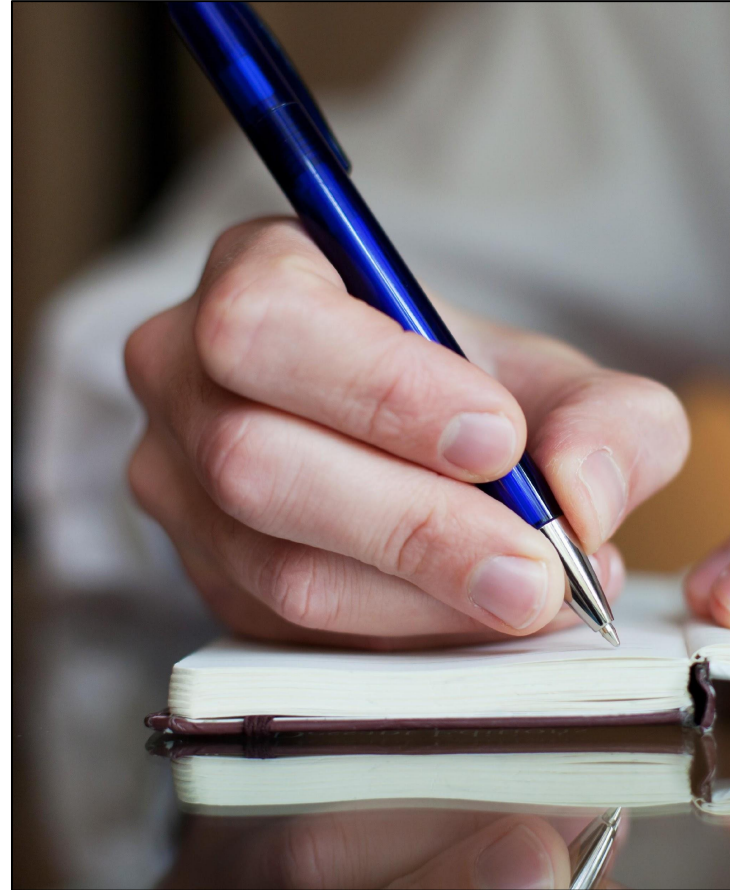

## Image Pair 8

Cannabis Image

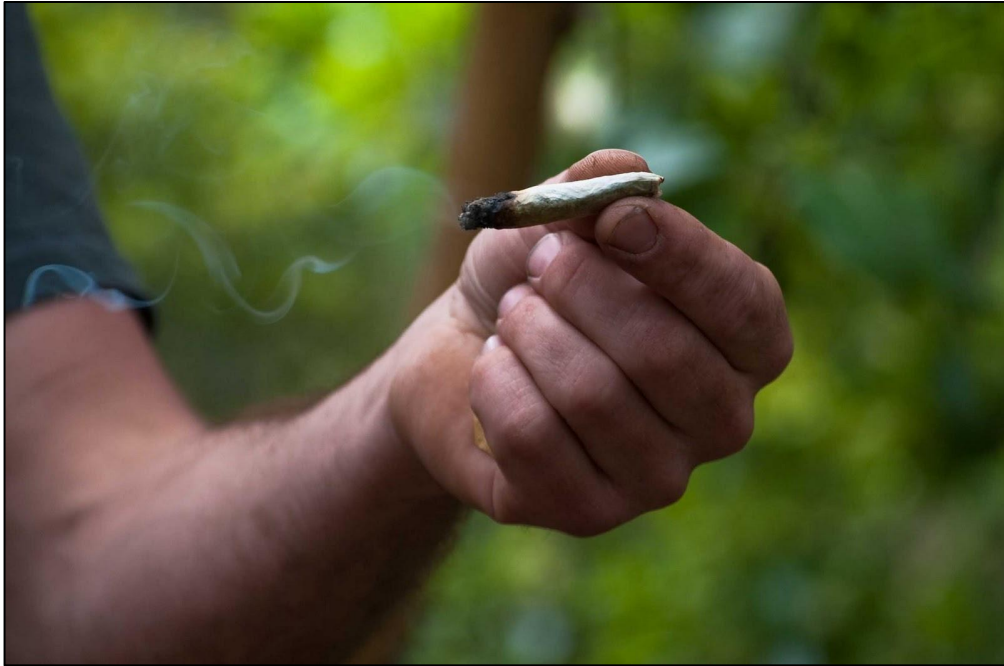

Control Image

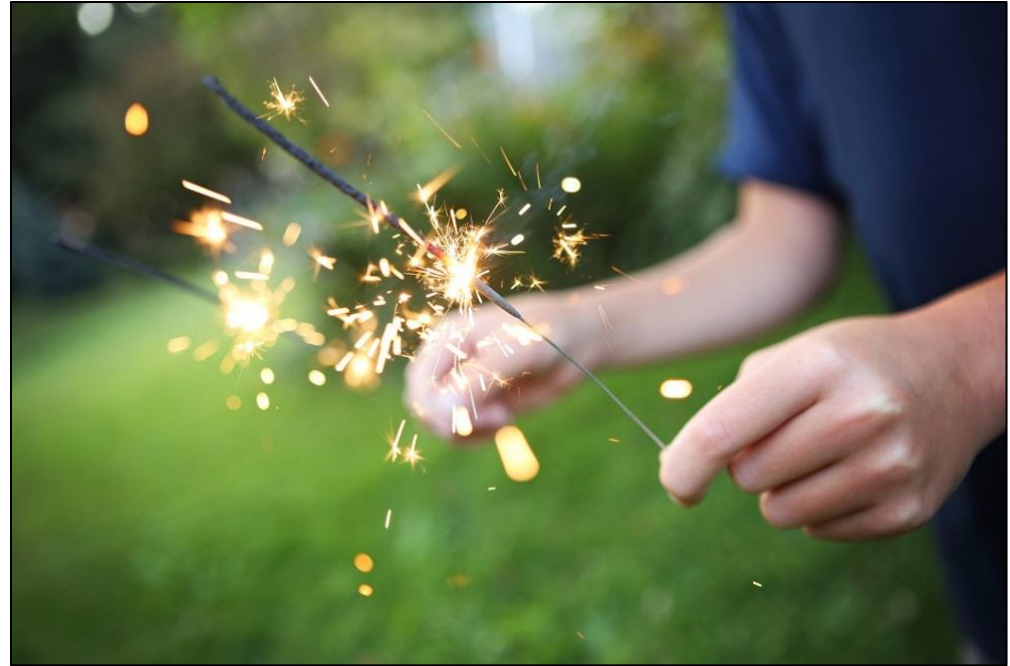



## Image Pair 9

Cannabis Image

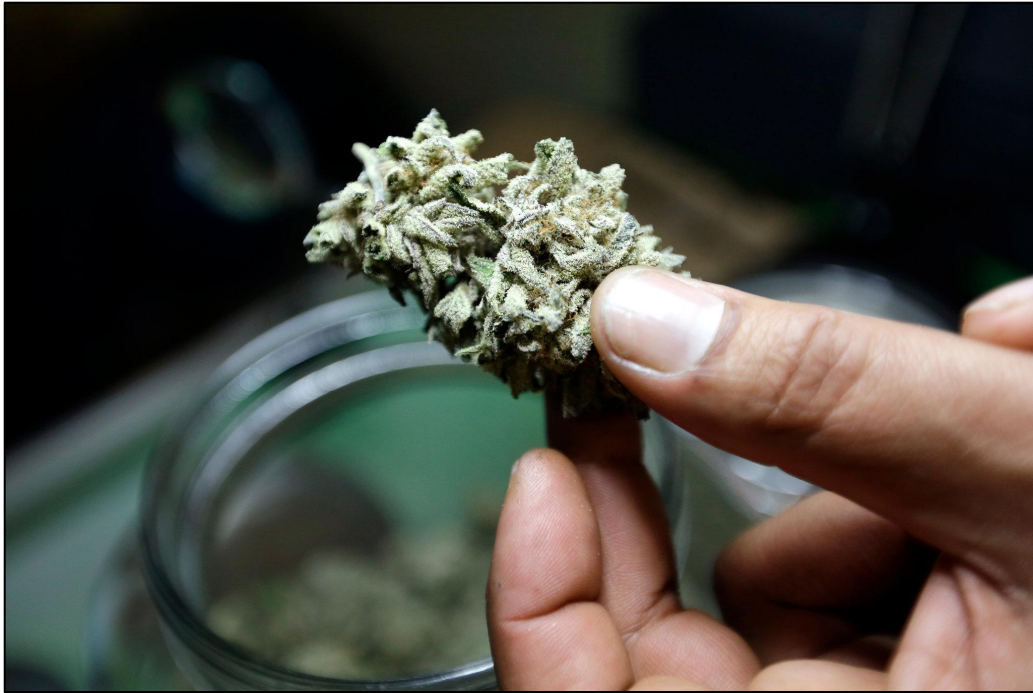

Control Image

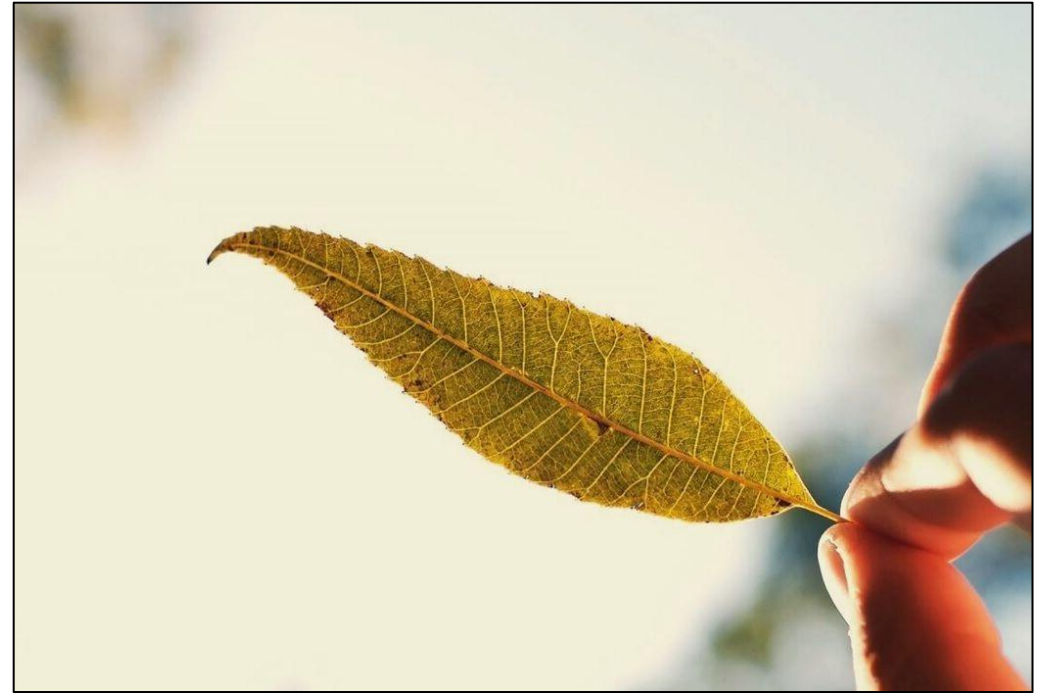

## Image Pair 10

Cannabis Image

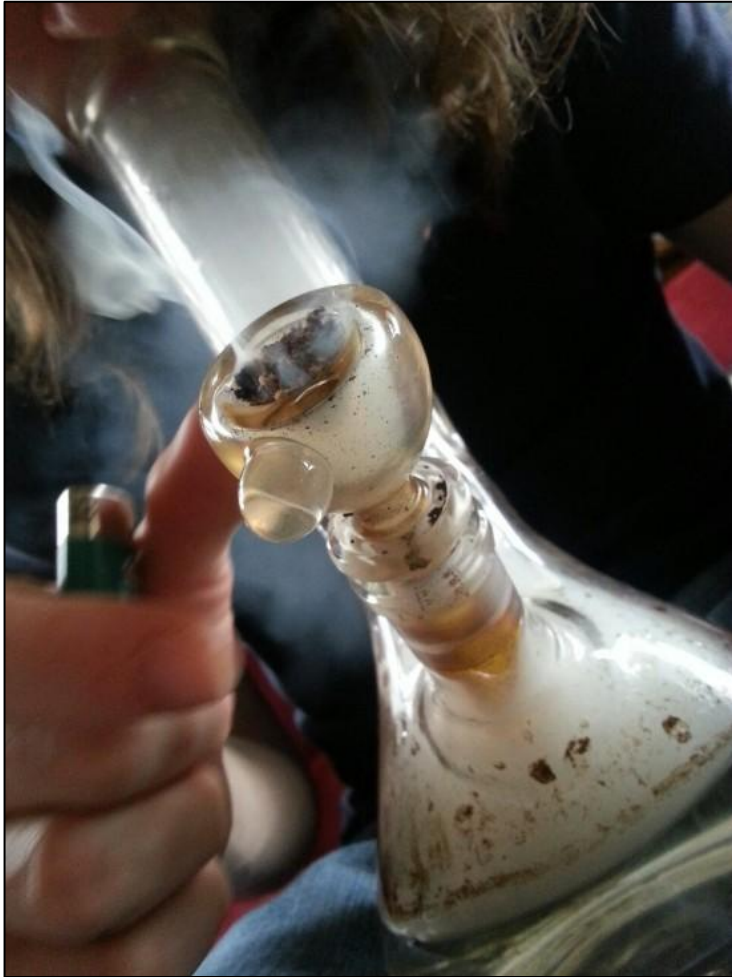

Control Image

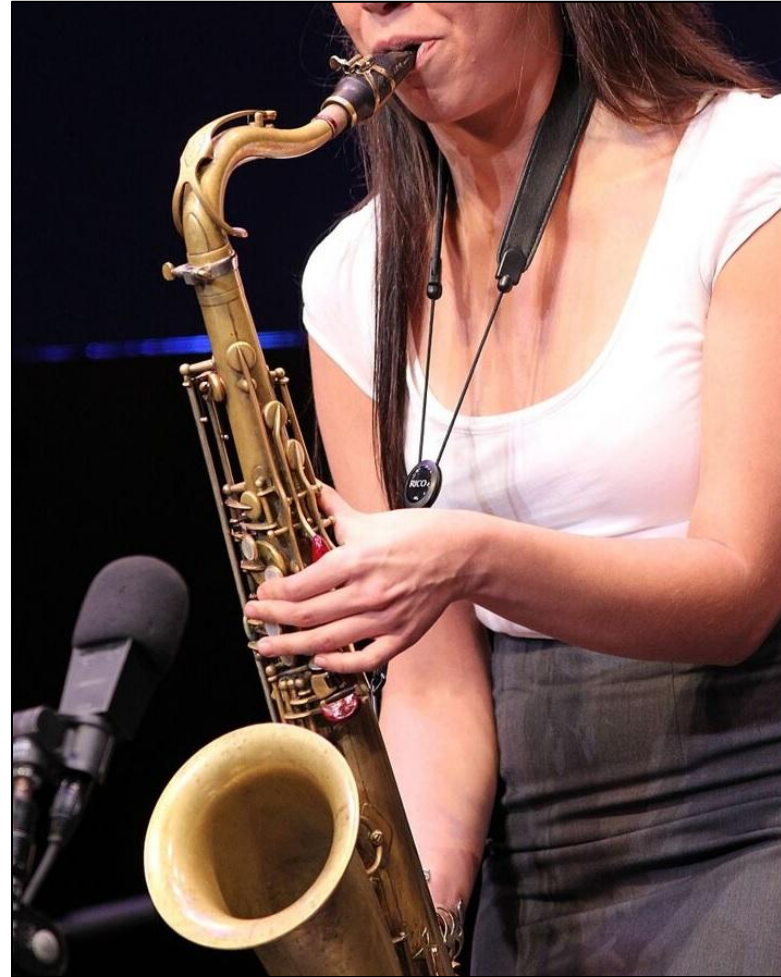

## Image Pair 11

Cannabis Image

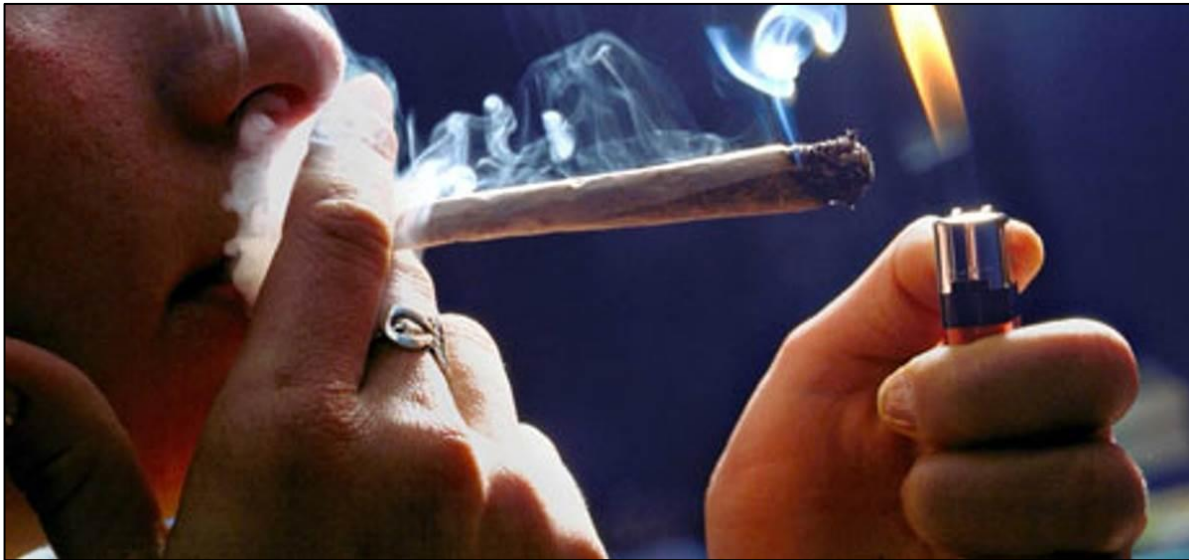

Control Image

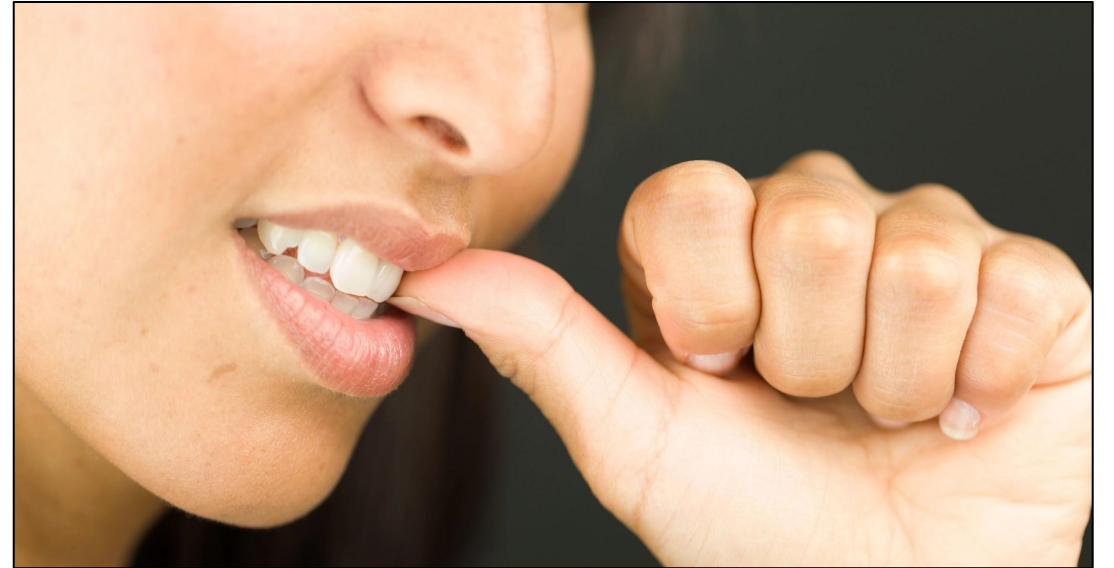

## Image Pair 12

Cannabis Image

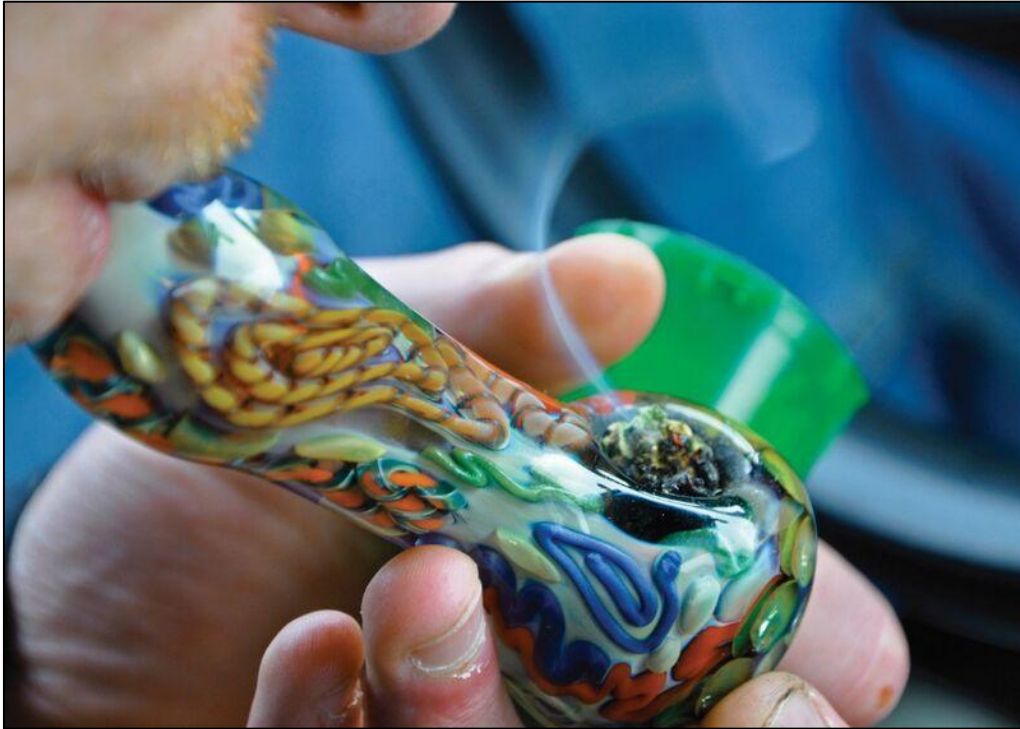

Control Image

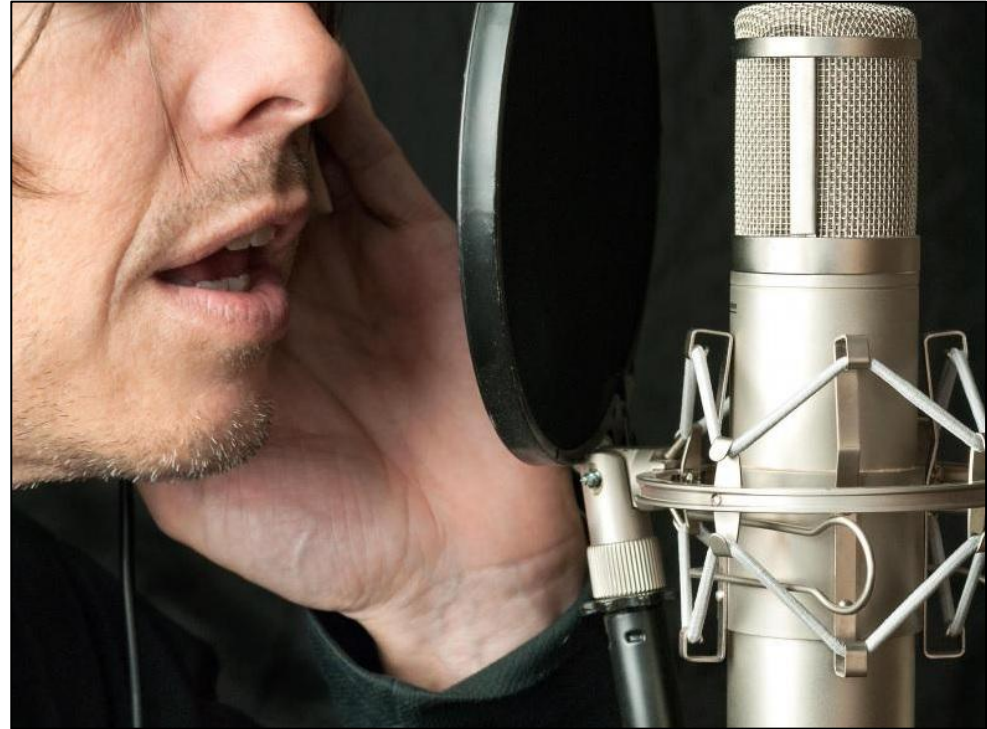

## Image Pair 13

Cannabis Image

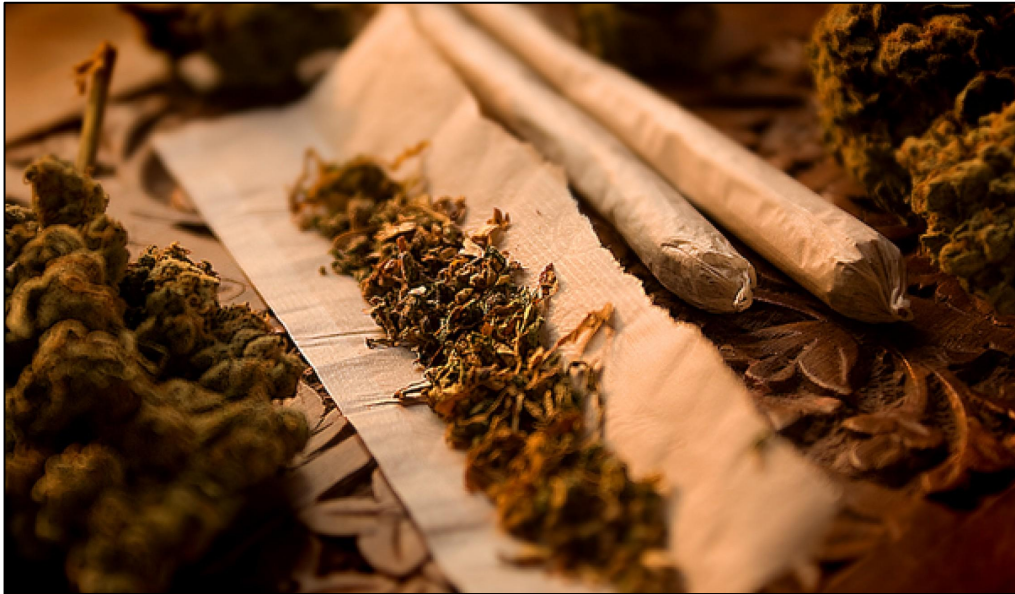

Control Image

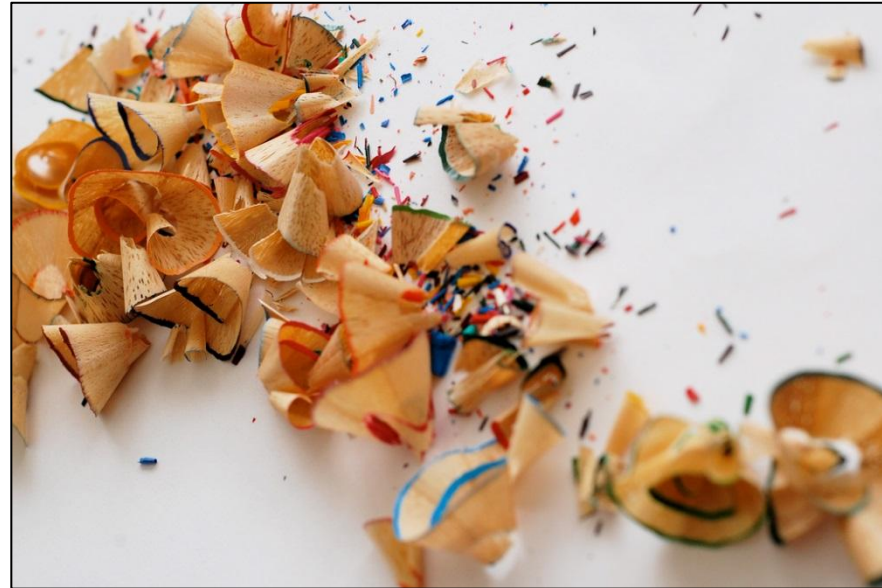

## Image Pair 14

Cannabis Image

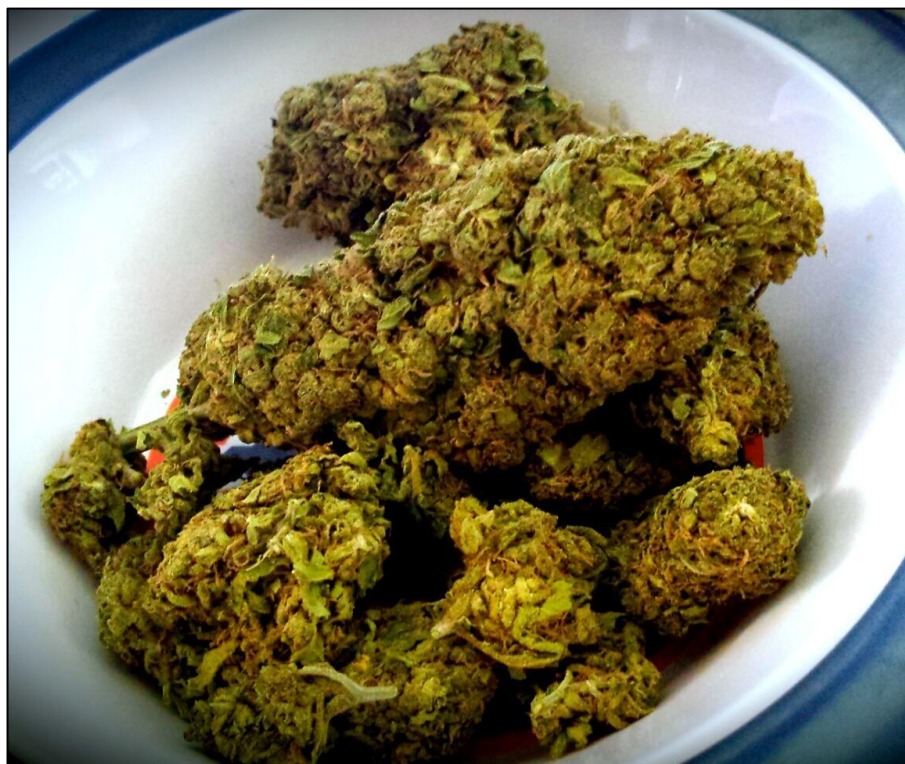

Control Image

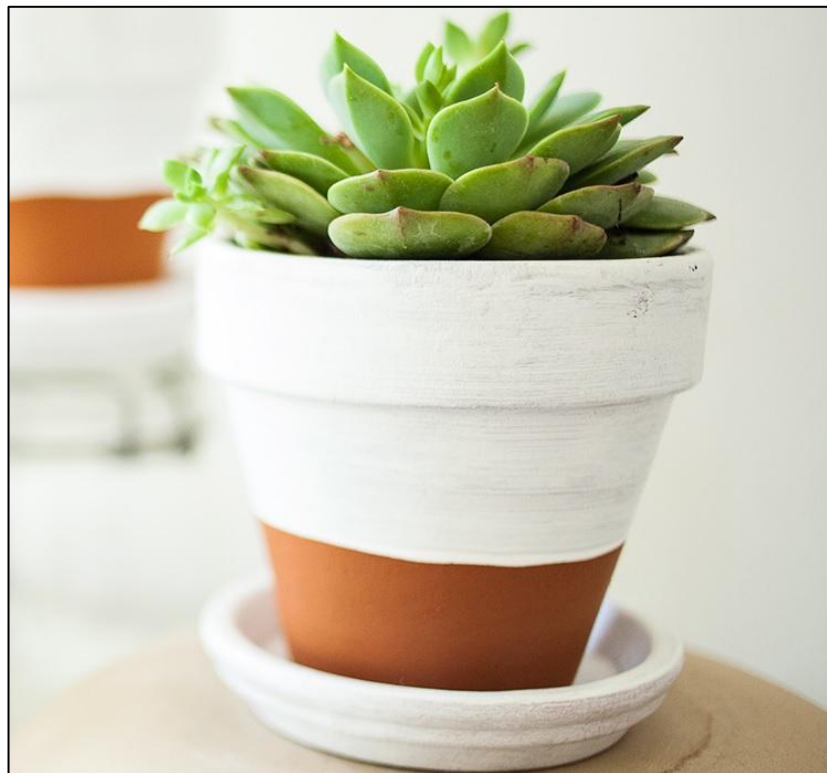

# Image Pair 15

Cannabis Image

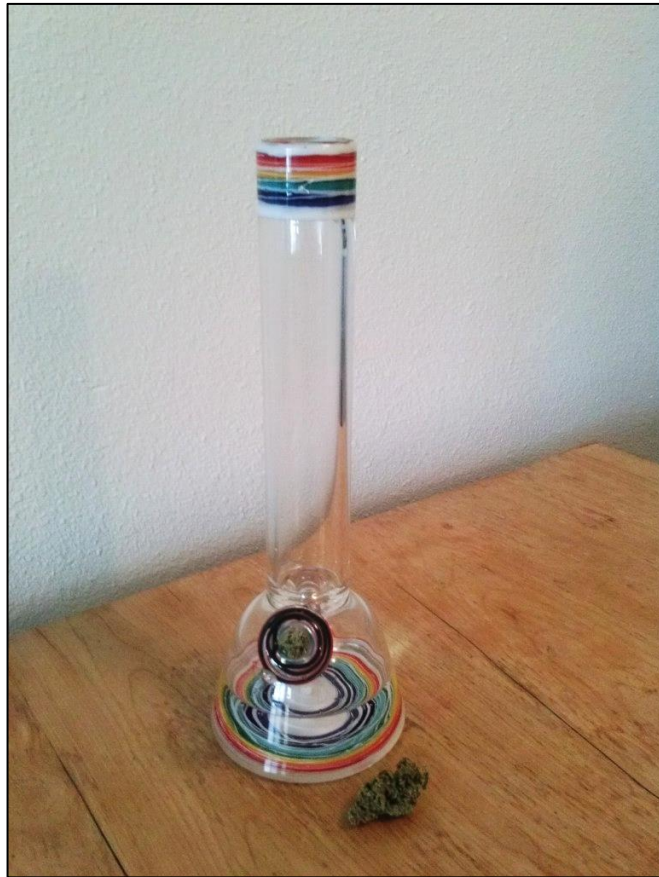

Control Image

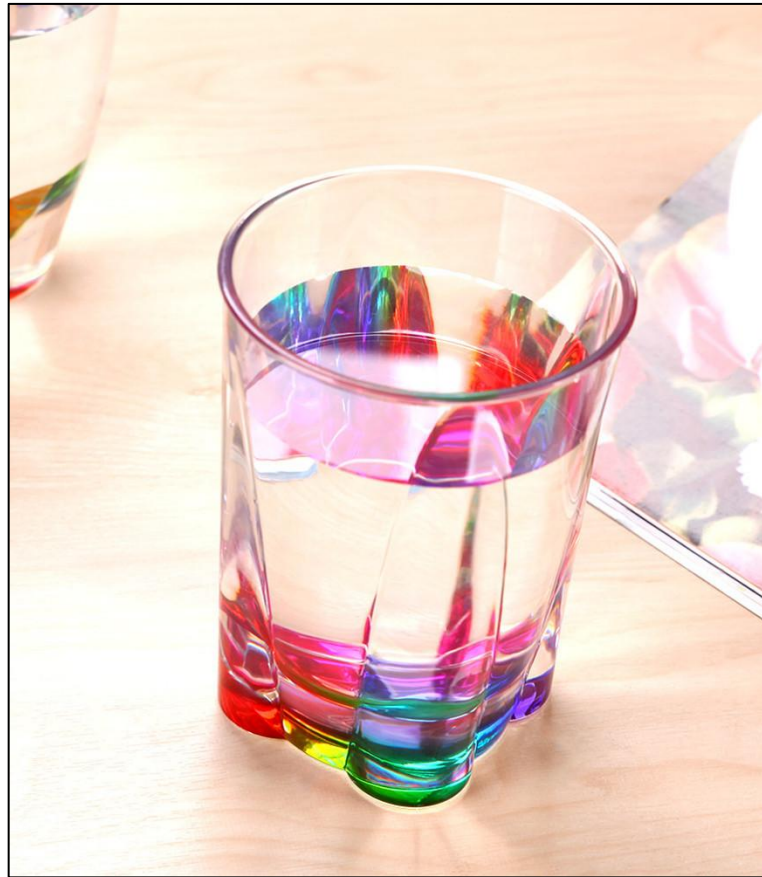

## Image Pair 16

Cannabis Image

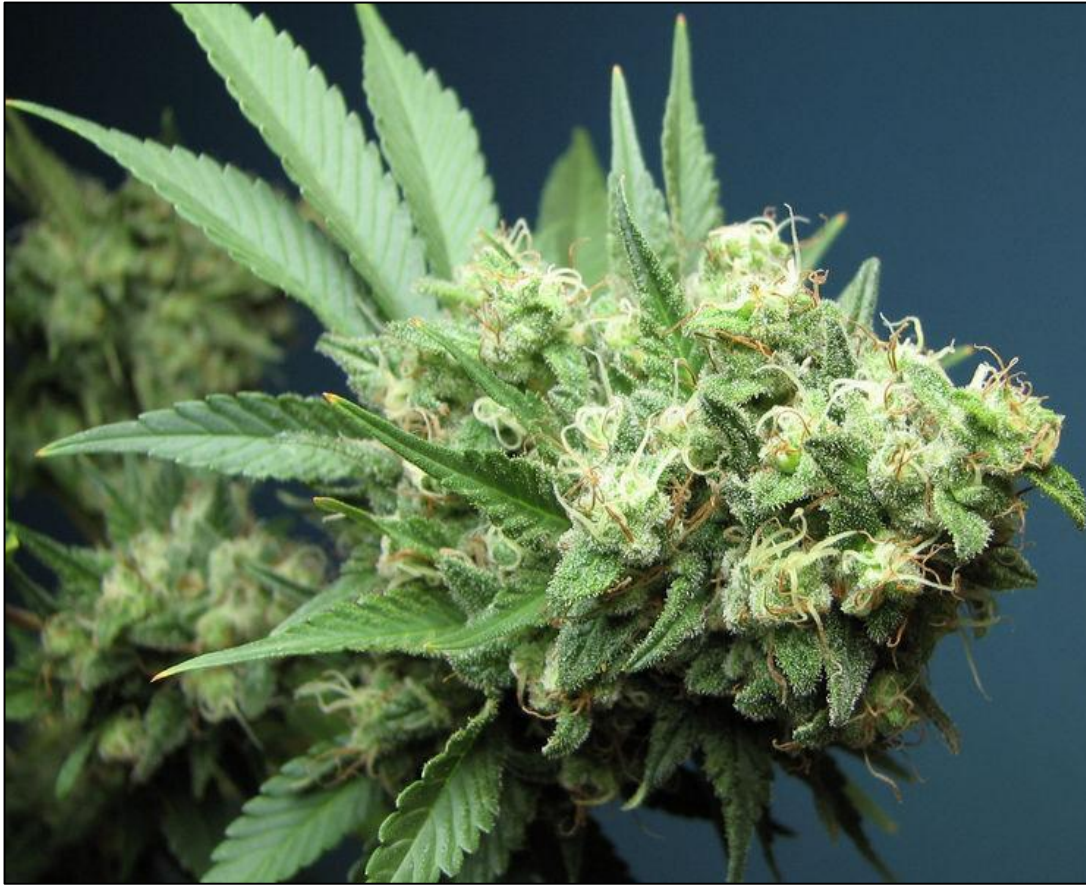

Control Image

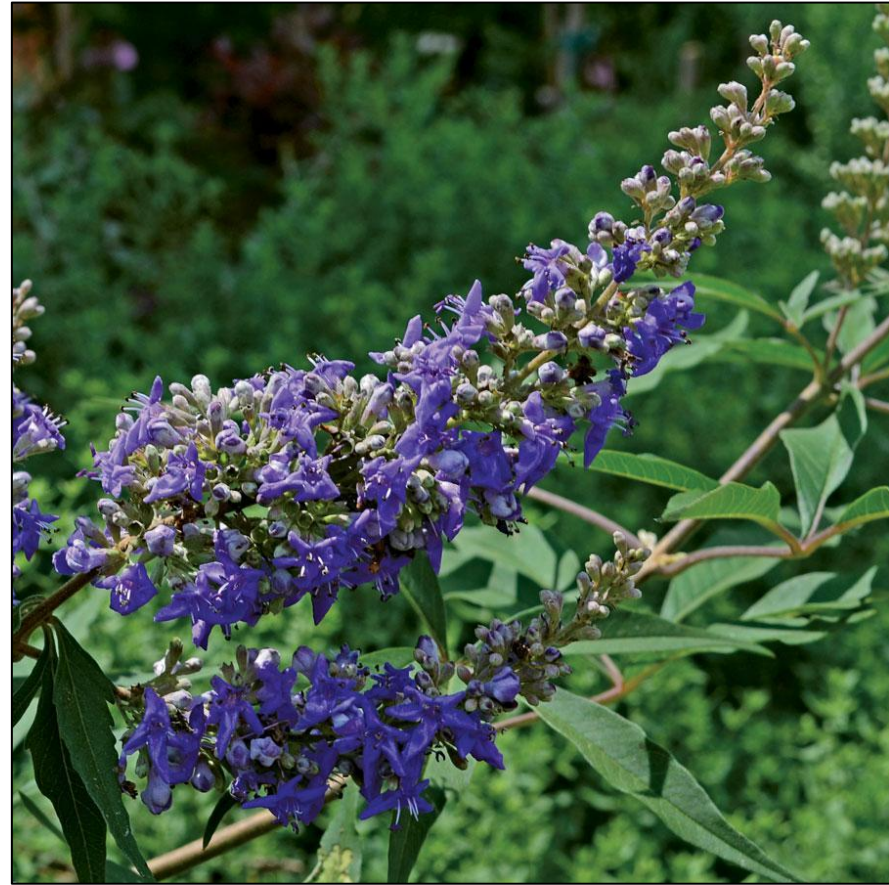



Image Pair 17

Cannabis Image

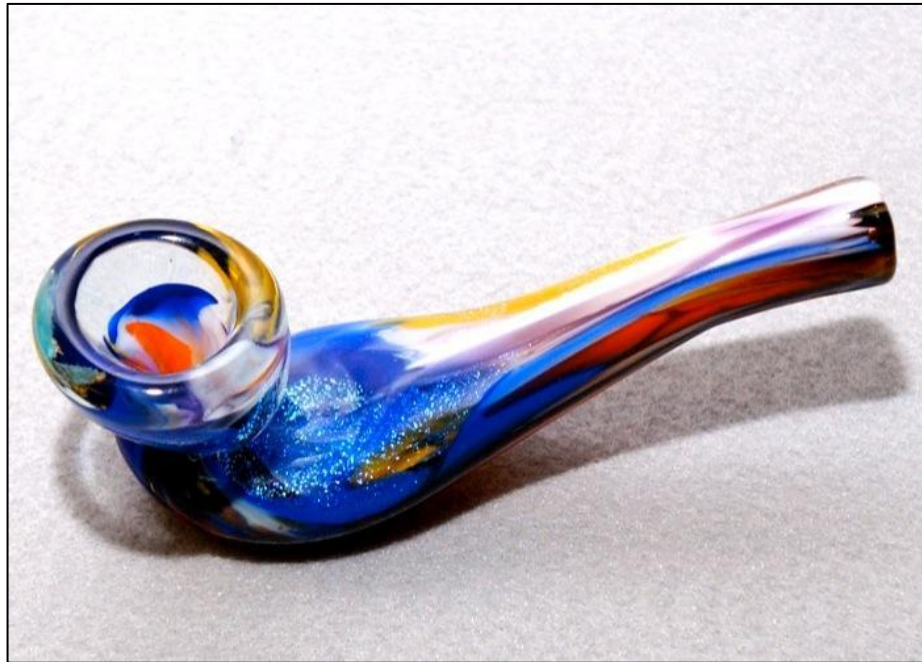

Control Image

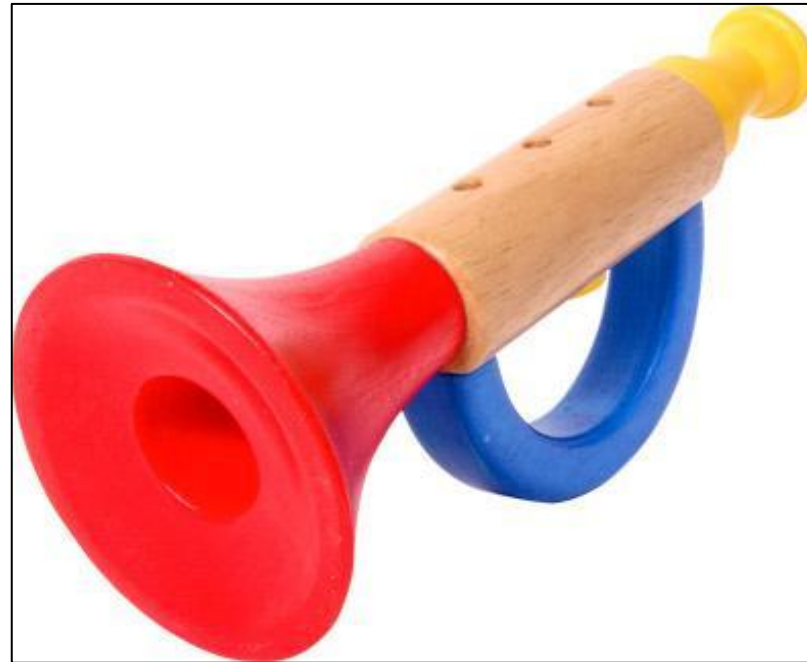

## Image Pair 18

Cannabis Image

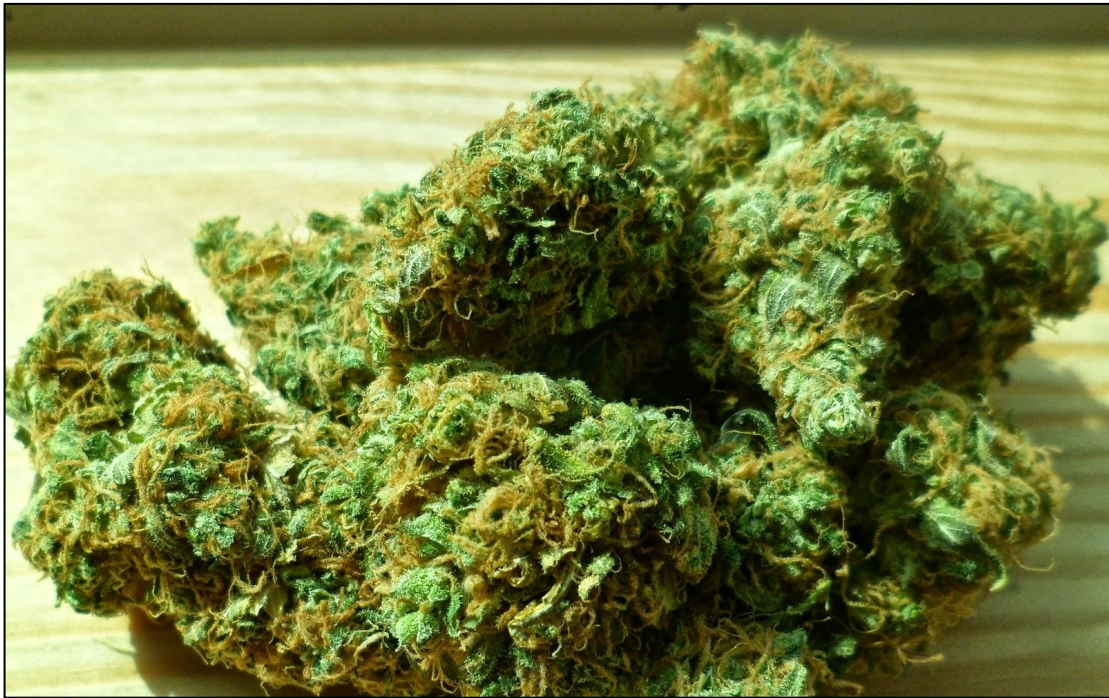

Control Image

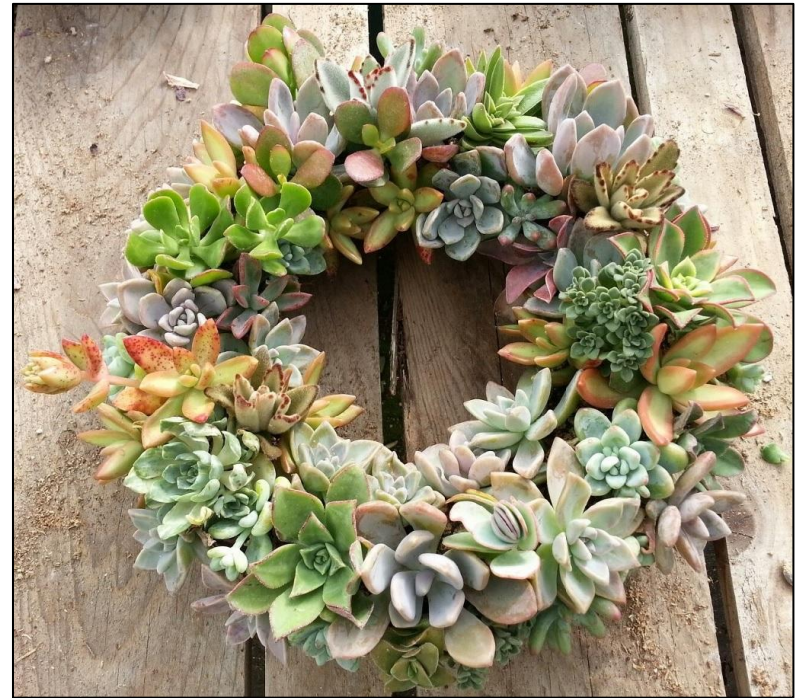

## Image Pair 19

Cannabis Image

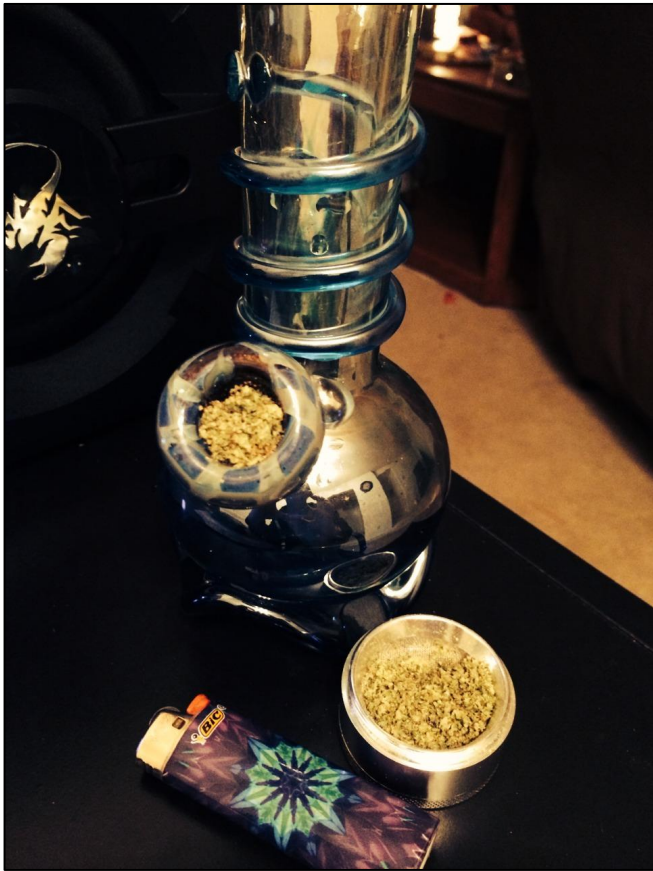

Control Image

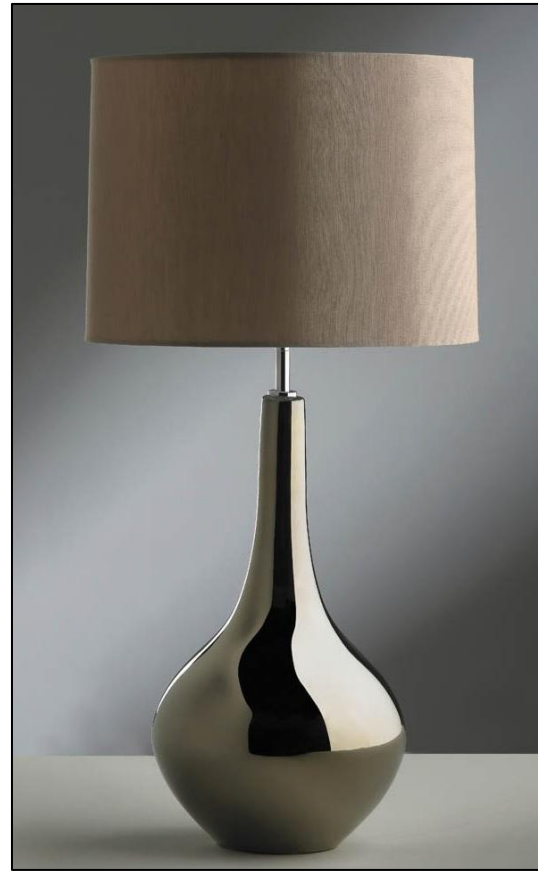

## Image Pair 20

Cannabis Image

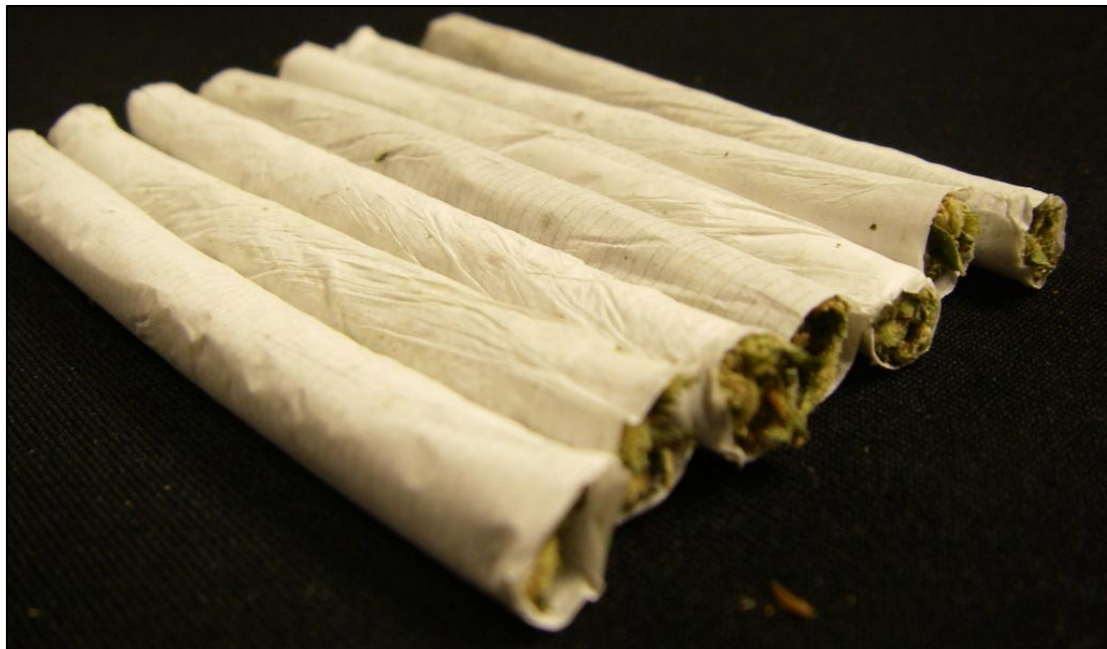

Control Image

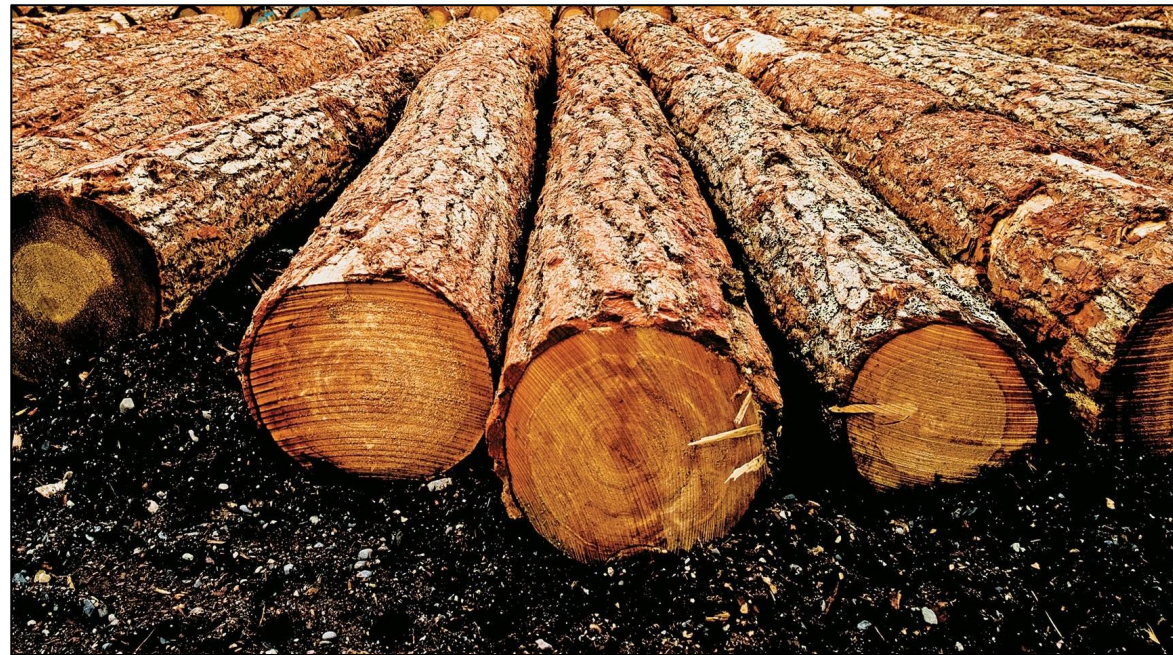

Image Pair 21

Cannabis Image

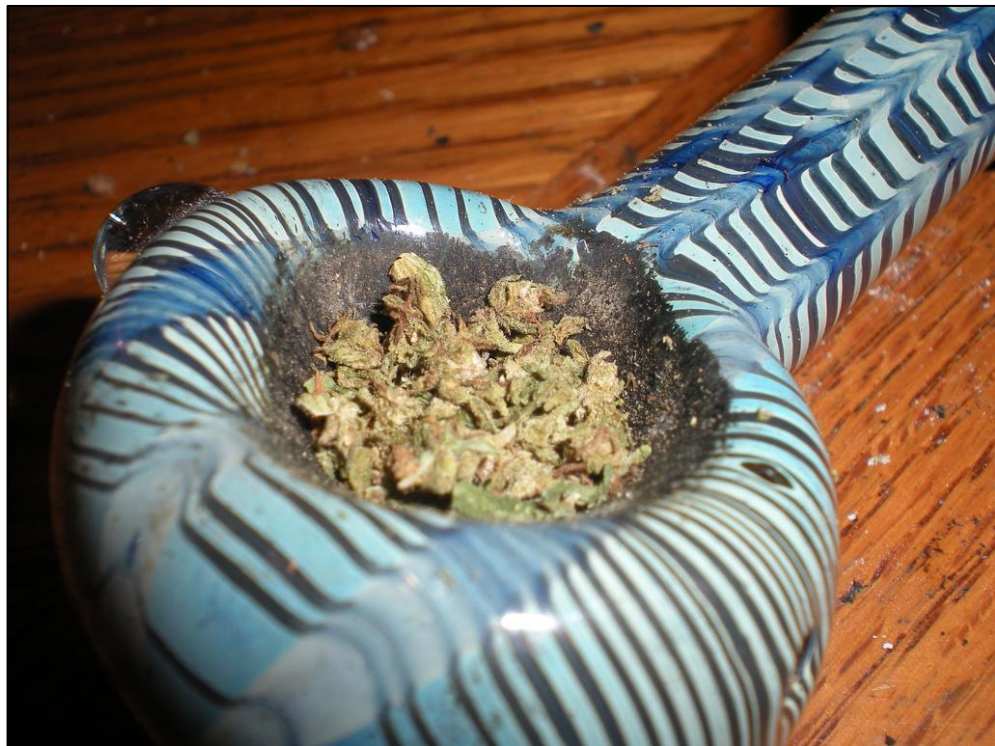

Control Image

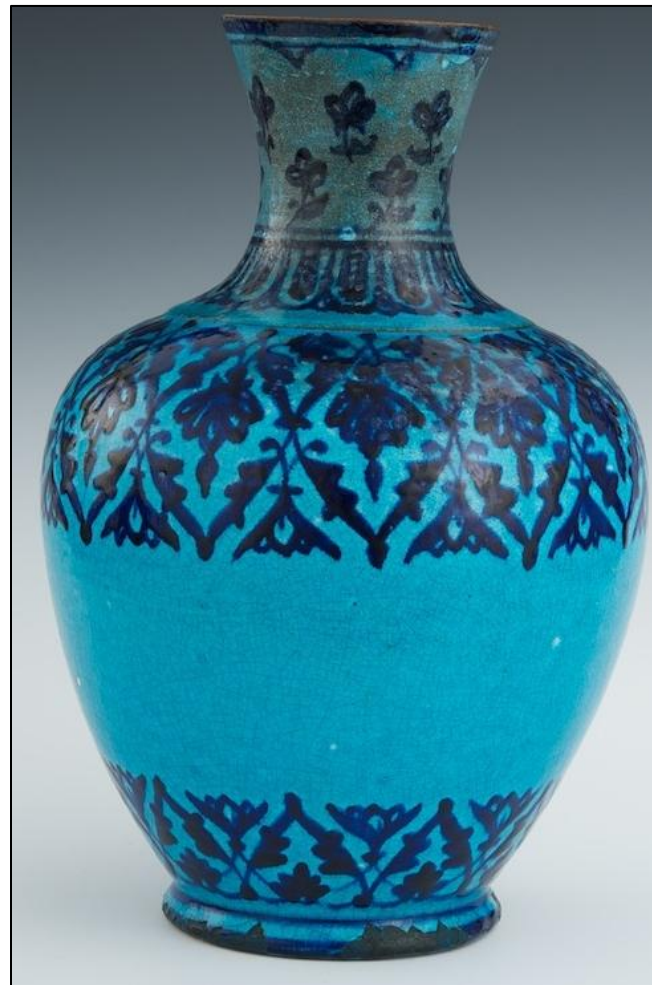

## Image Pair 22

Cannabis Image

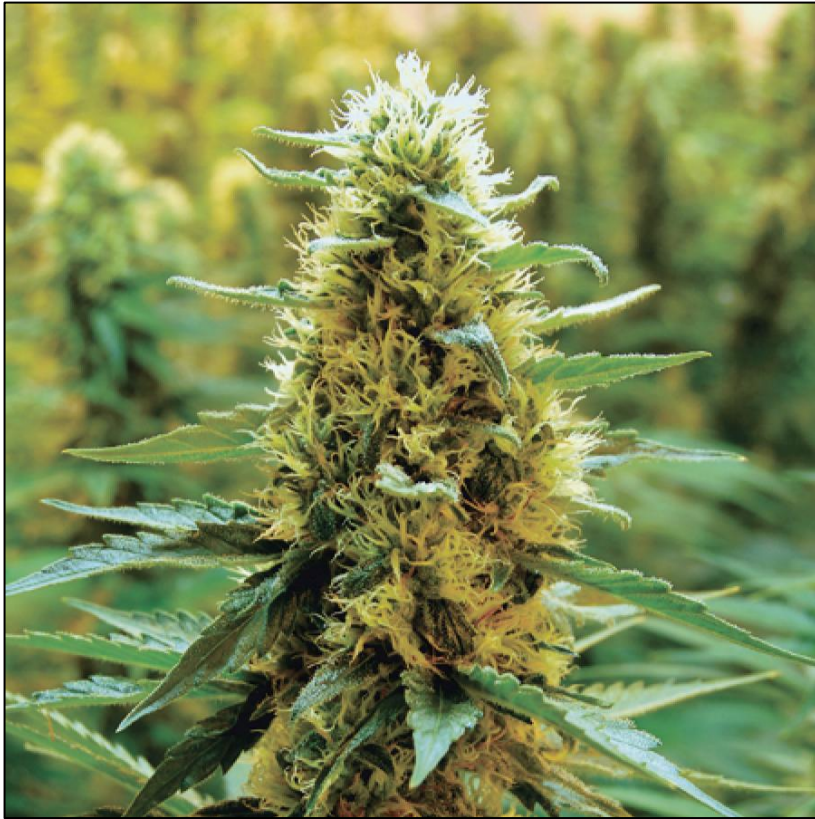

Control Image

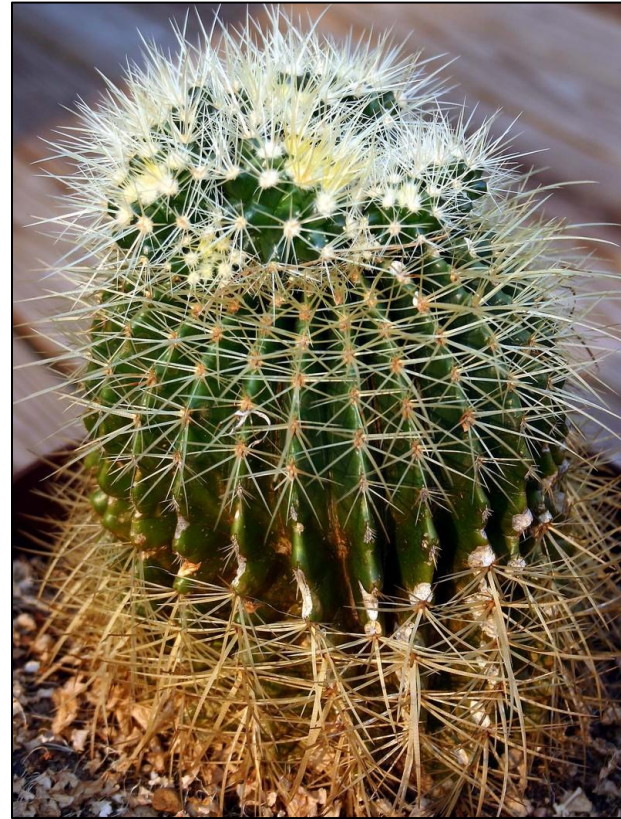

## Image Pair 23

Cannabis Image

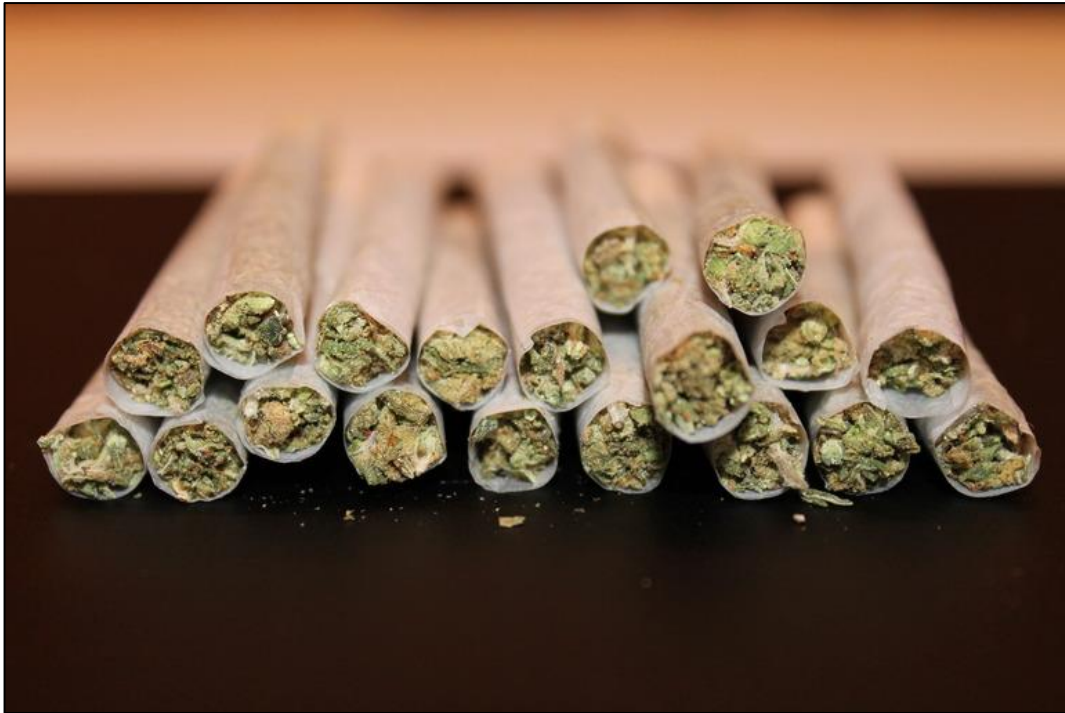

Control Image

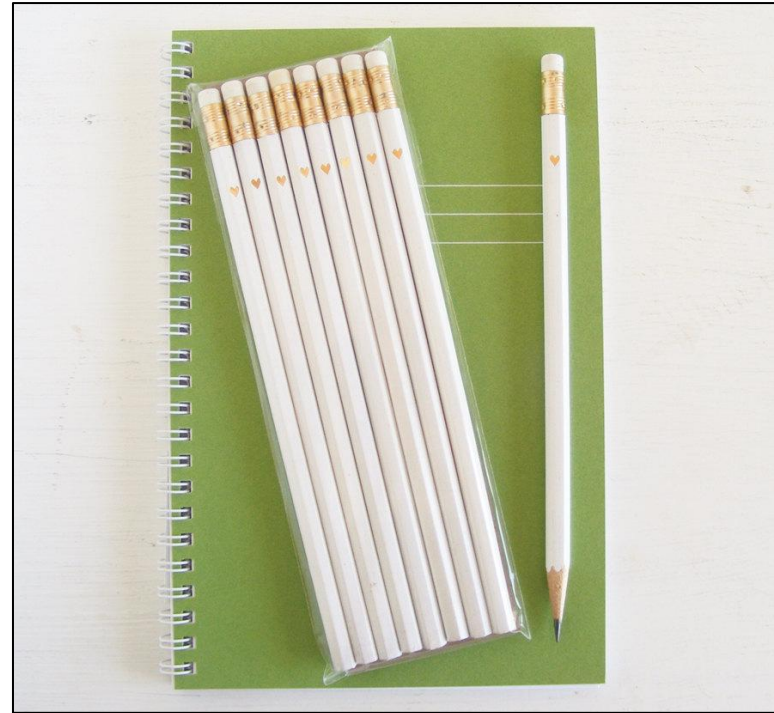

## Image Pair 24

Cannabis Image

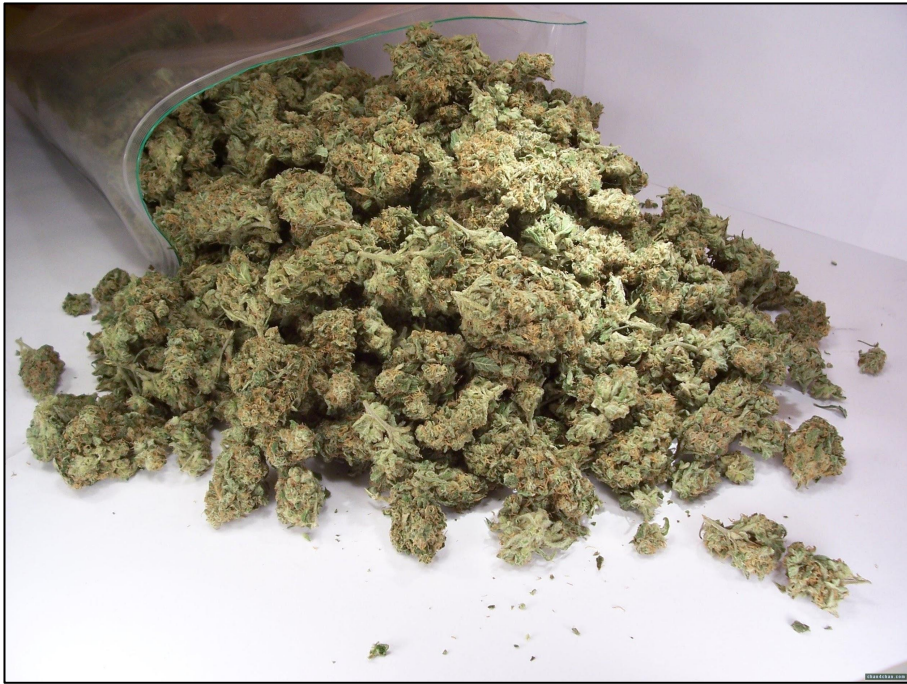

Control Image

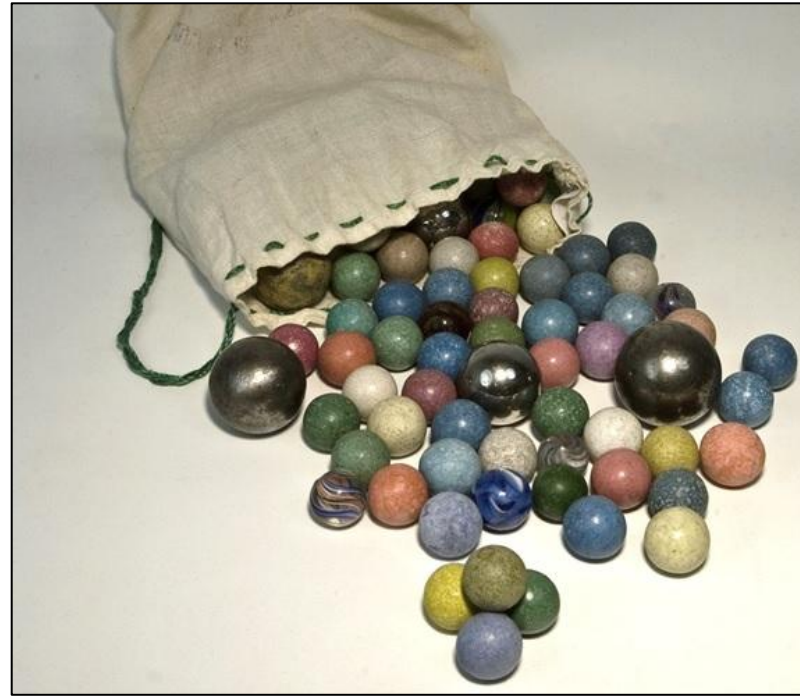



## Image Pair 25

Cannabis Image

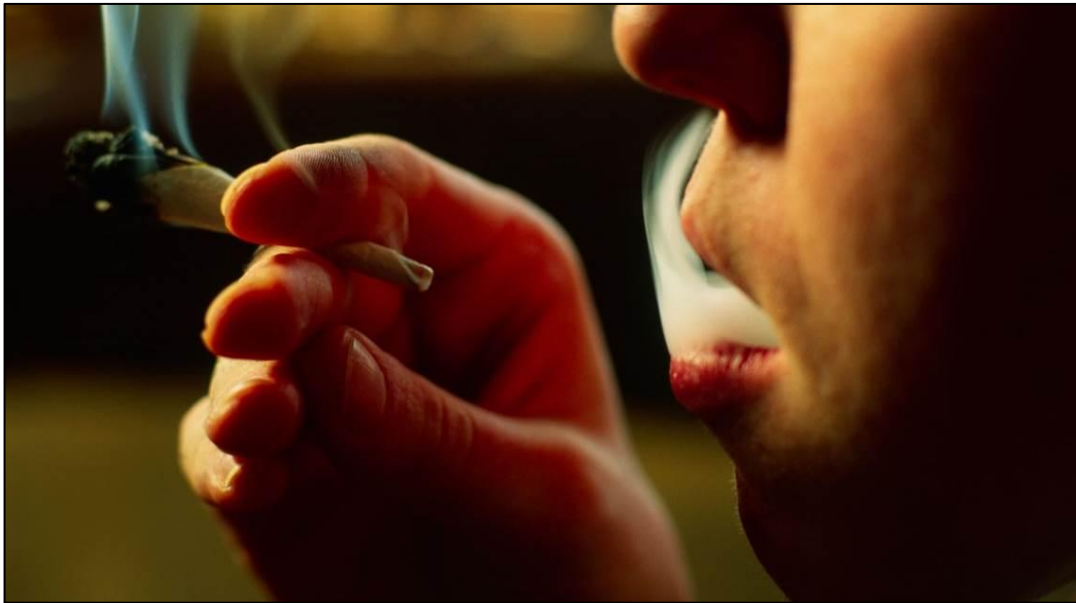

Control Image

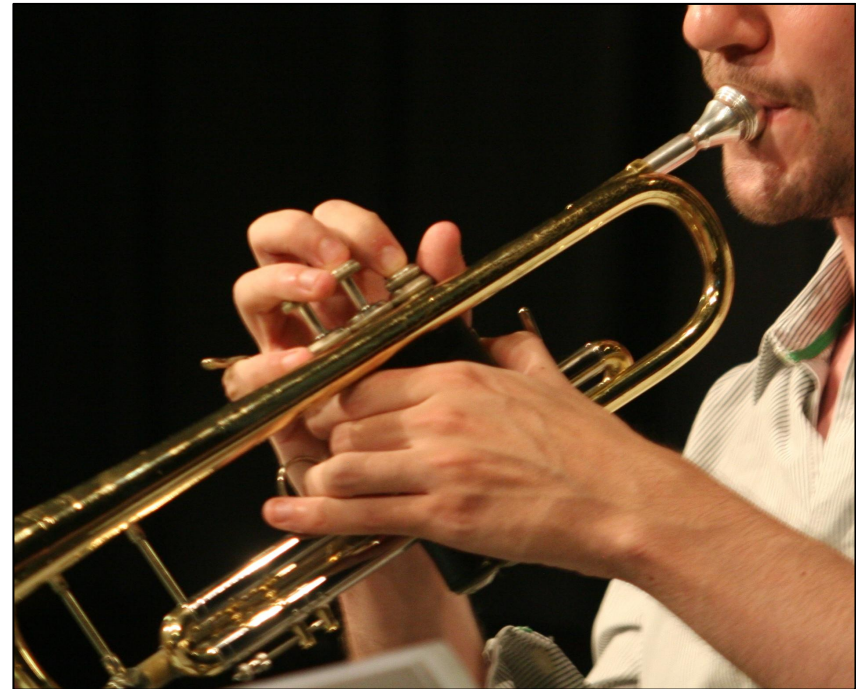

## Image Pair 26

Cannabis Image

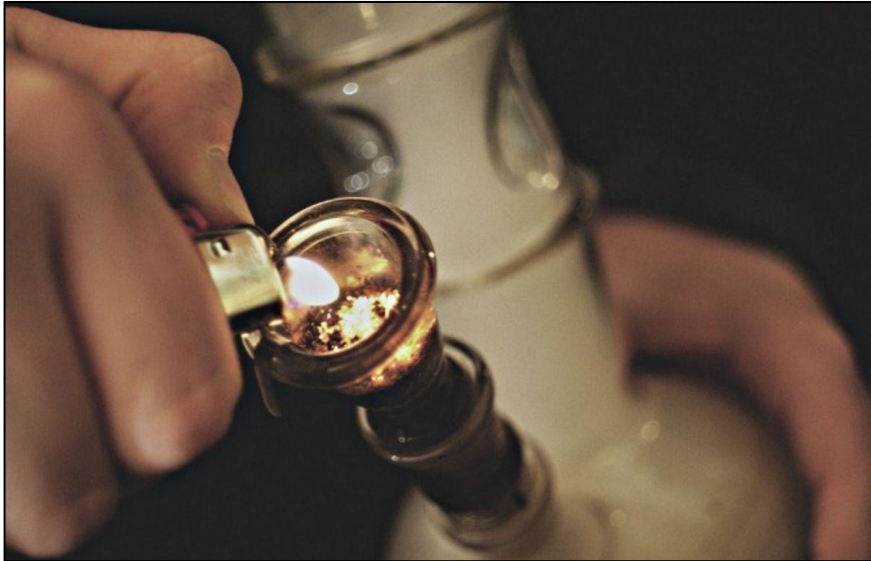

Control Image

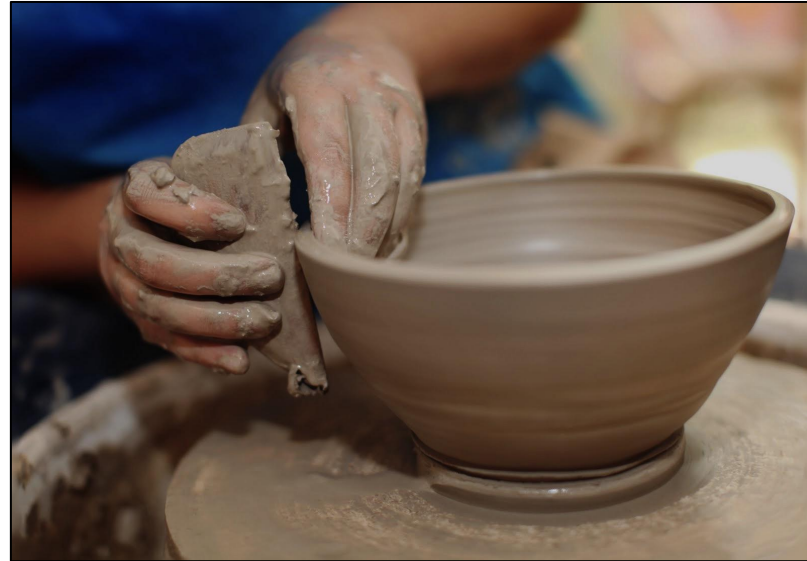

## Image Pair 27

Cannabis Image

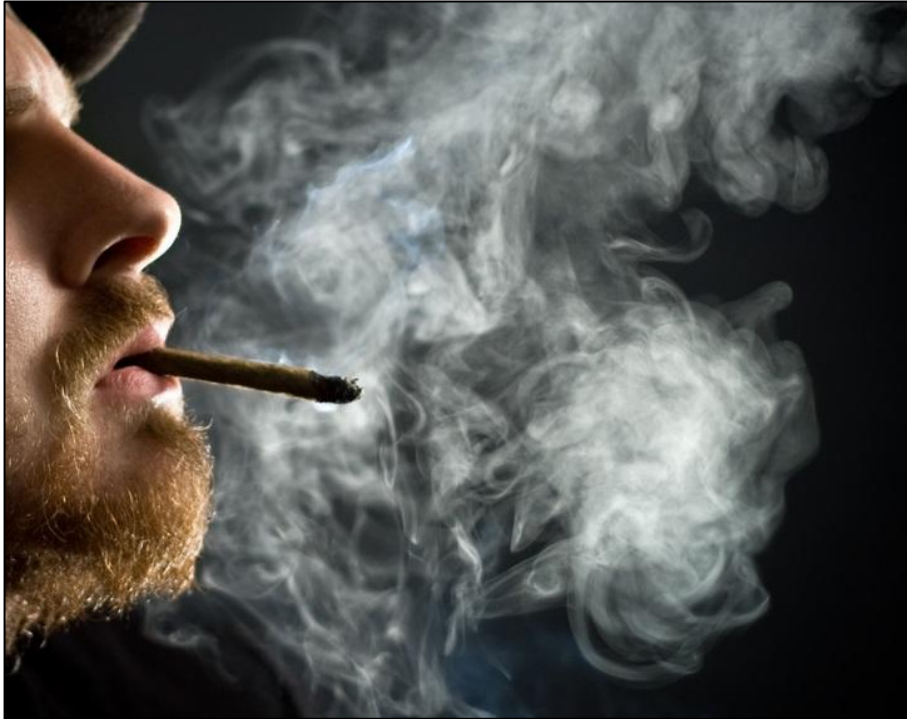

Control Image

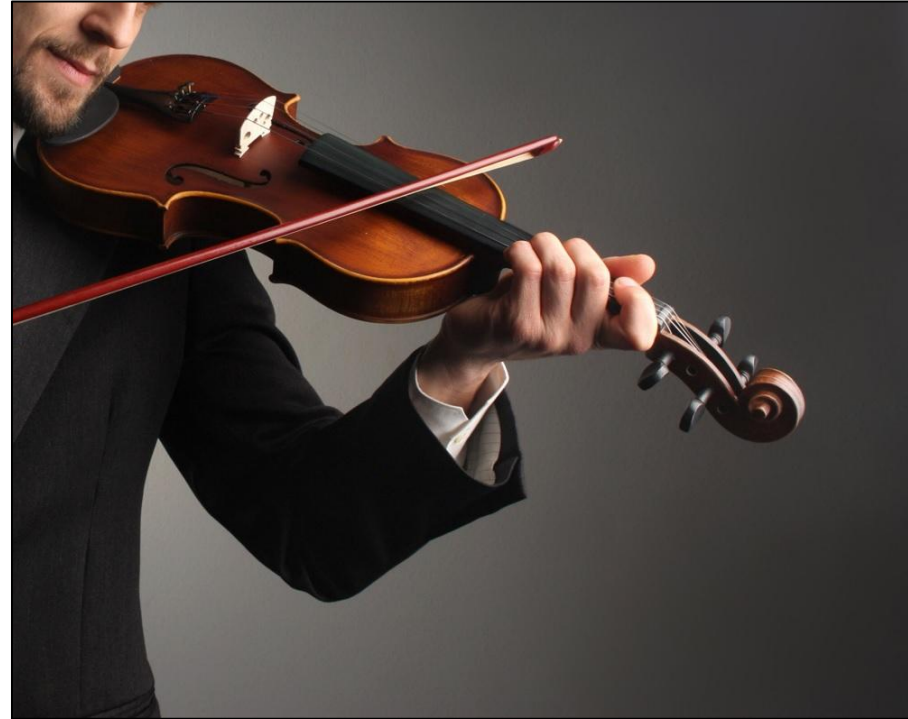

## Image Pair 28

Cannabis Image

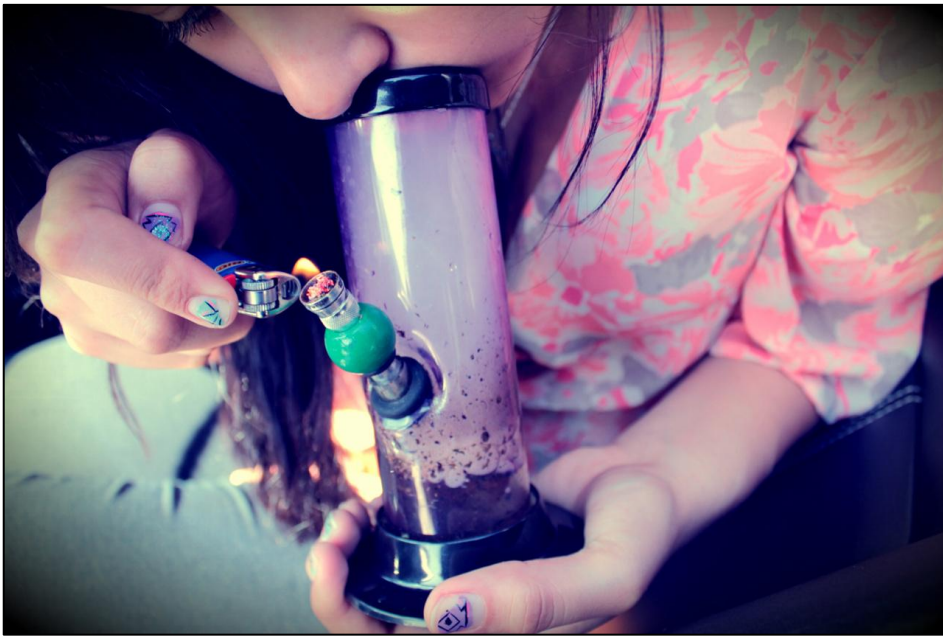

Control Image

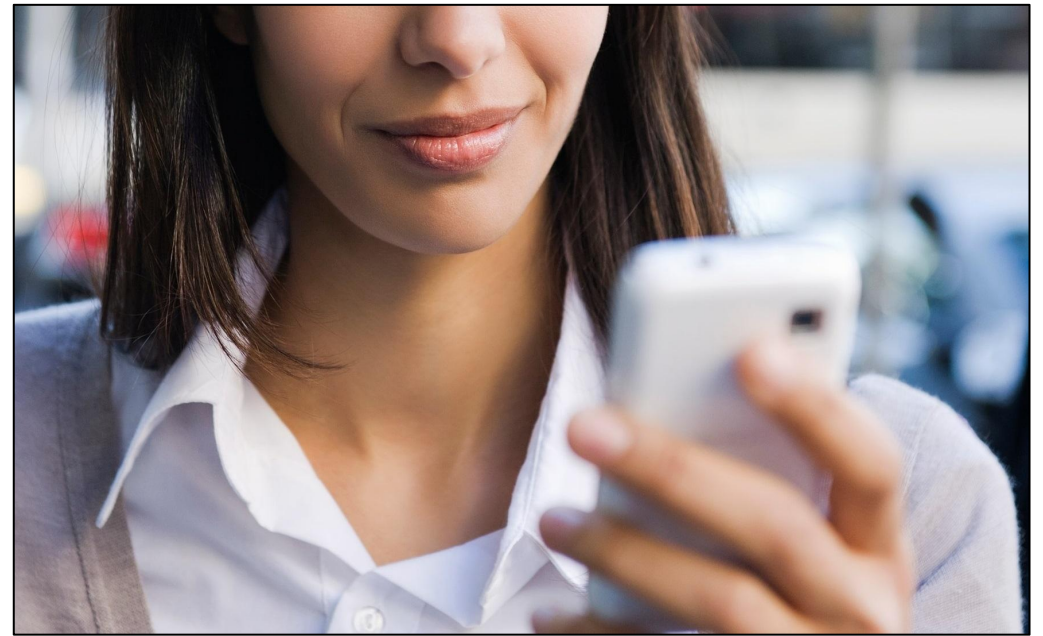

## Image Pair 29

Cannabis Image

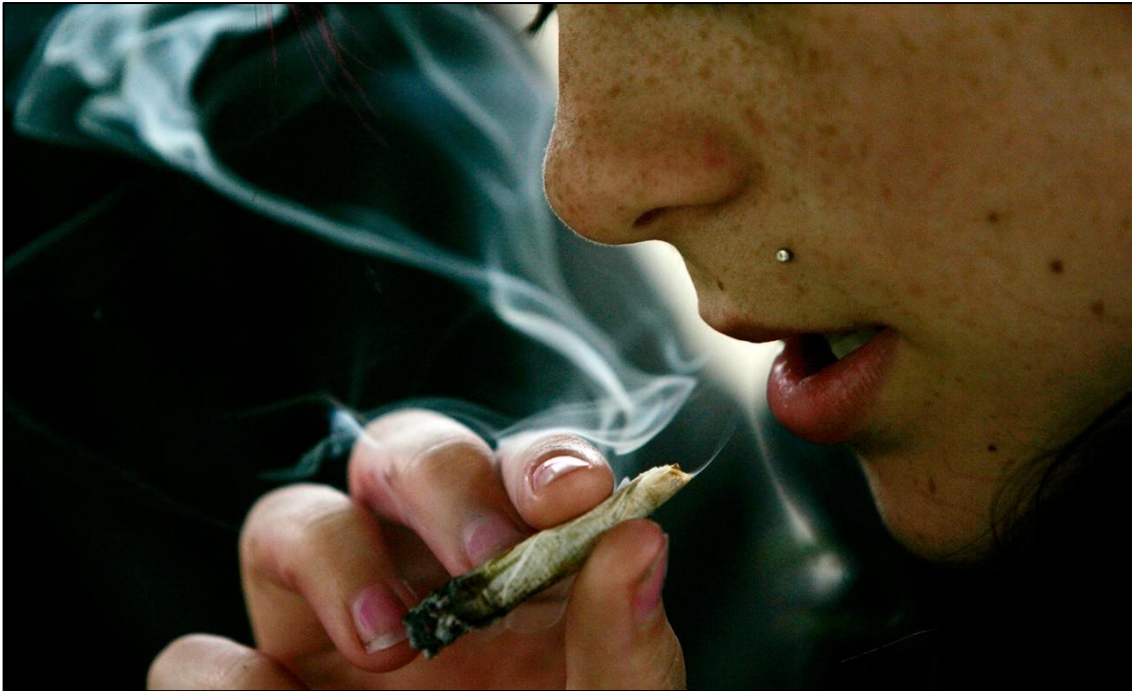

Control Image

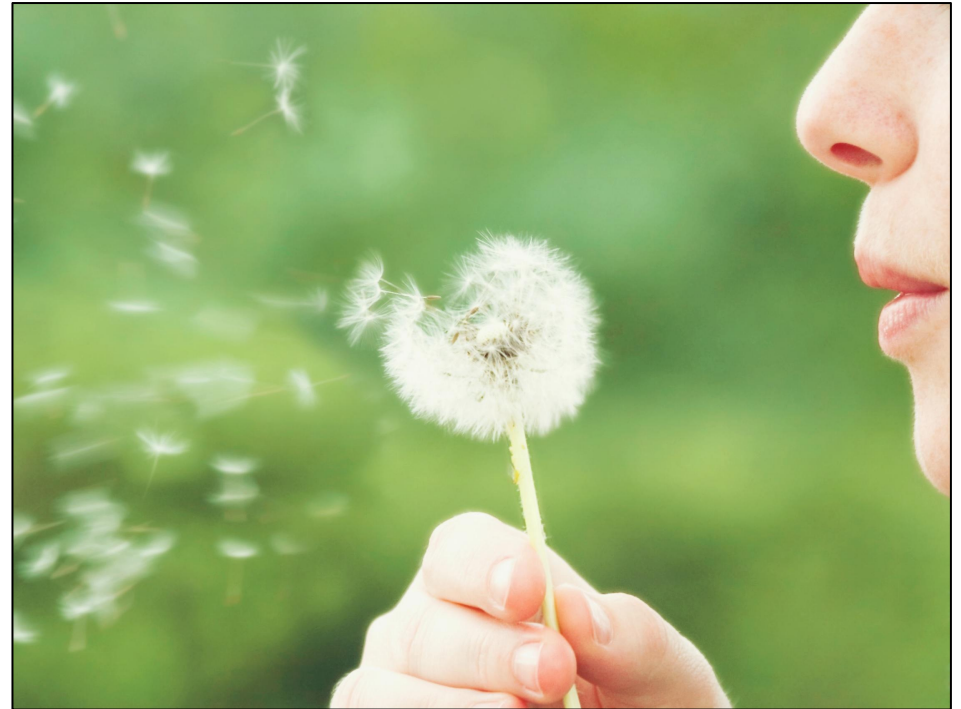

Image Pair 30

Cannabis Image

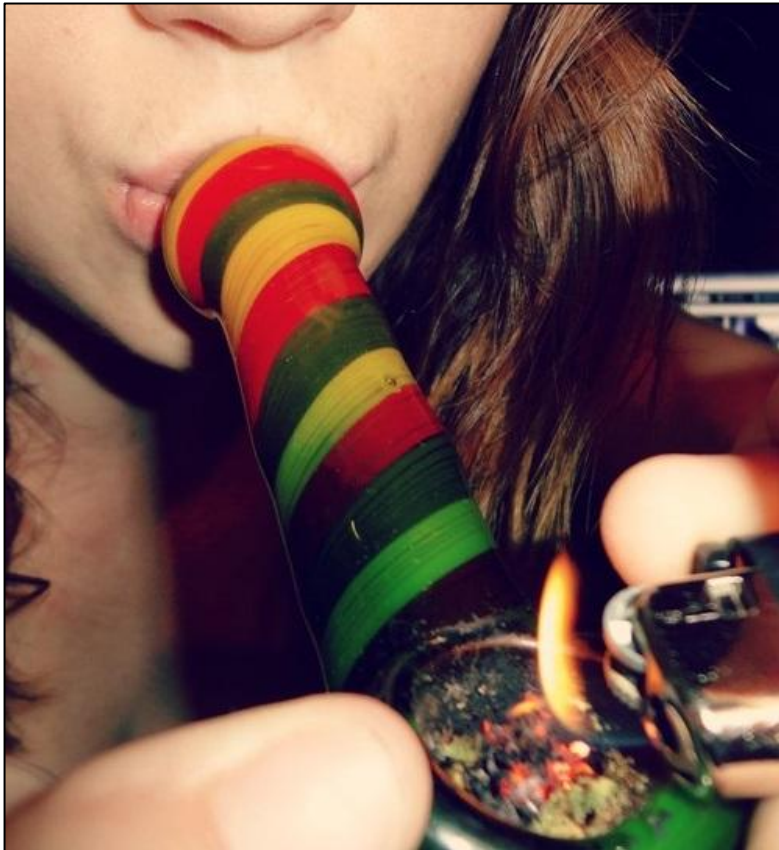

Control Image

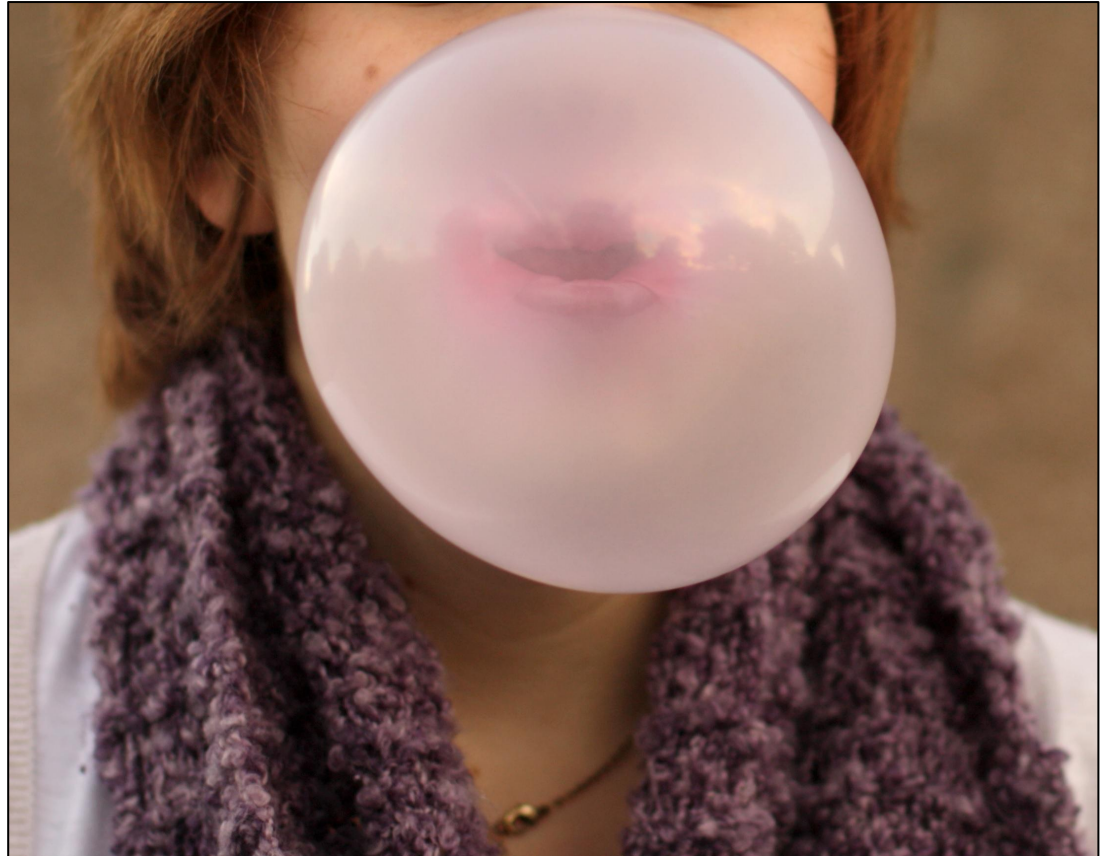

## Image Pair 31

Cannabis Image

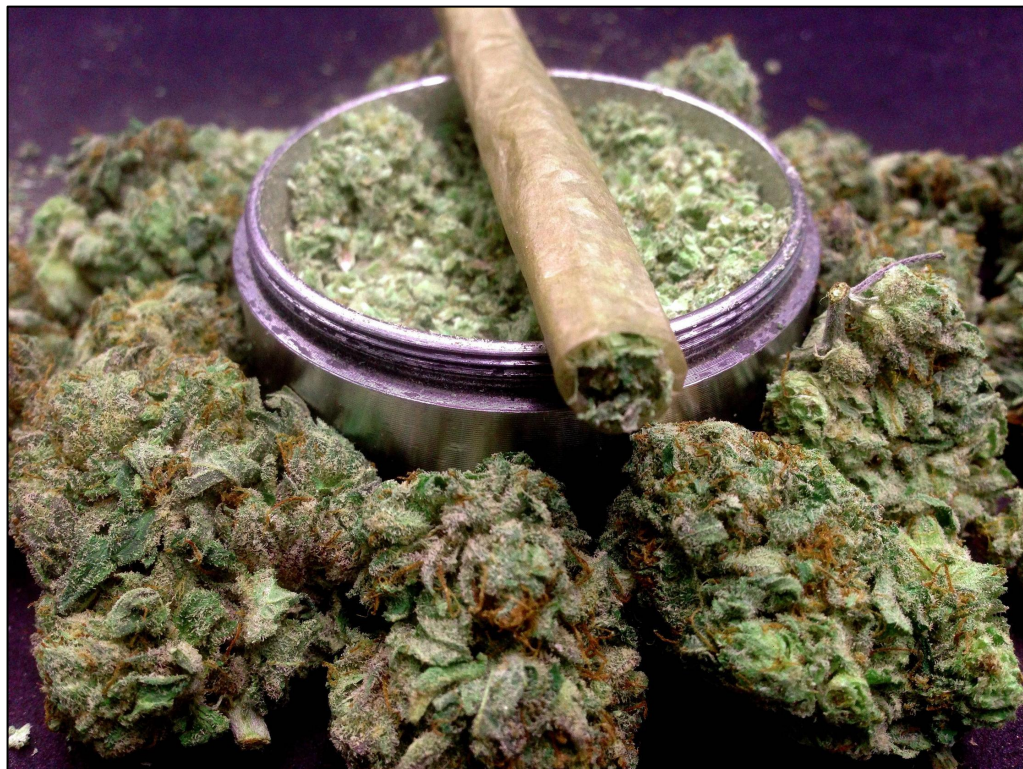

Control Image

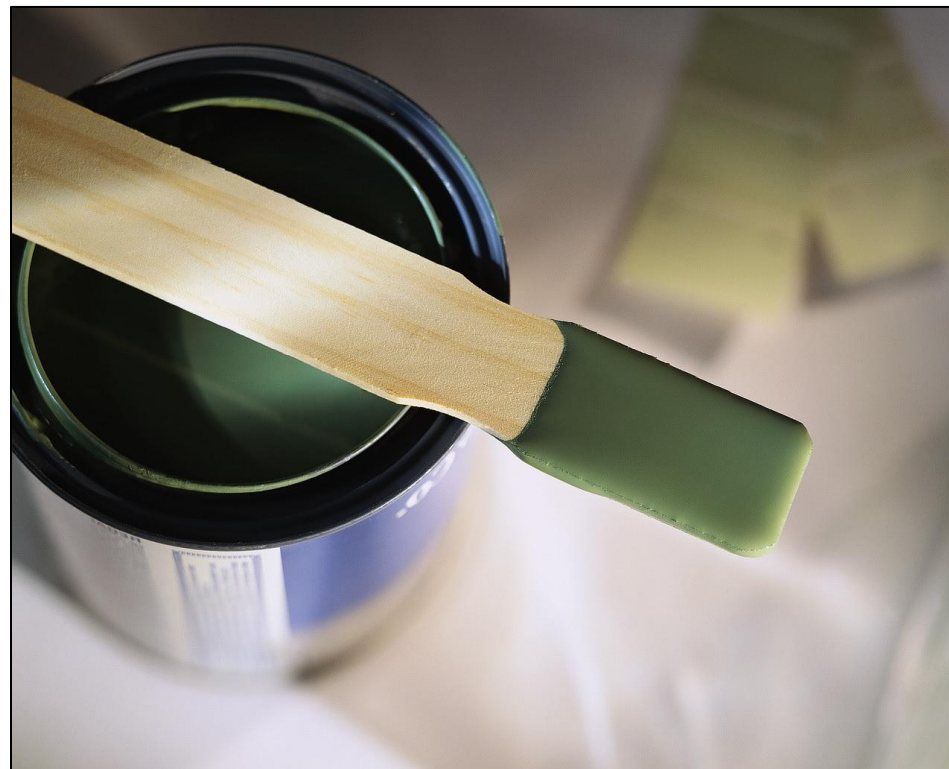

## Image Pair 32

Cannabis Image

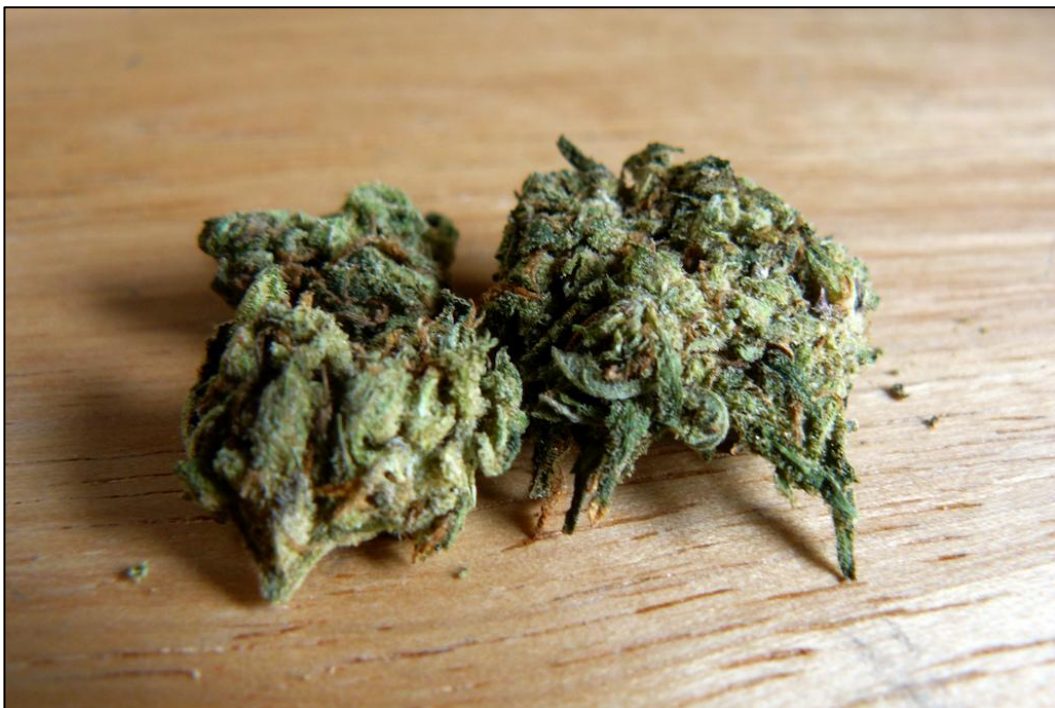

Control Image

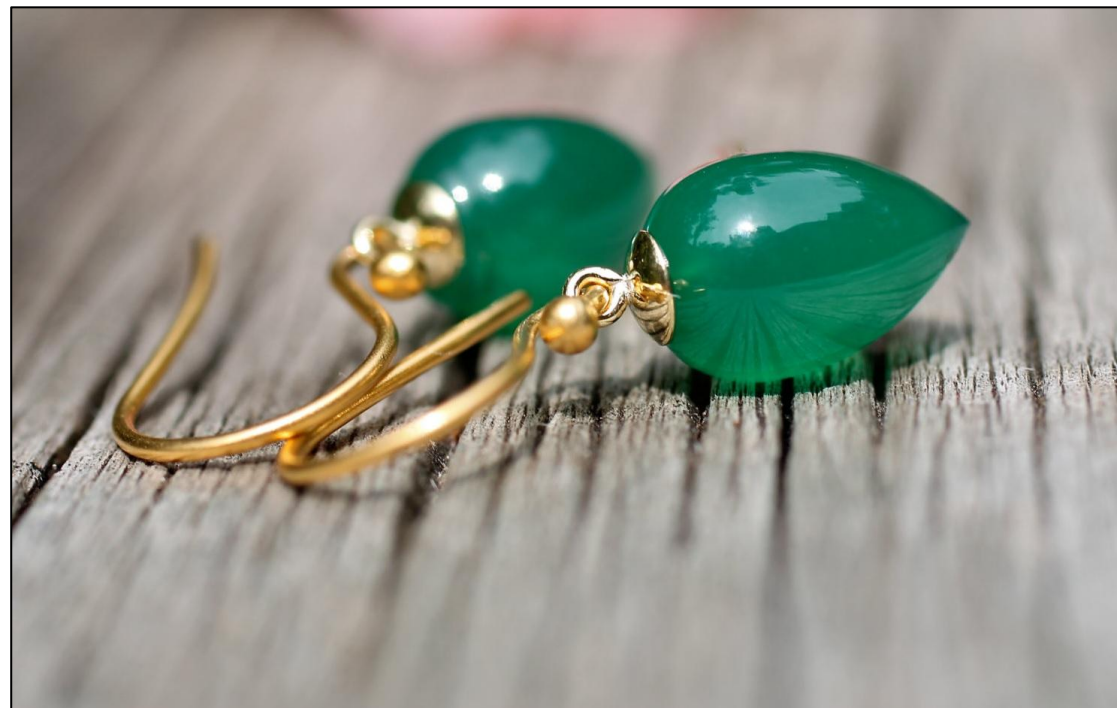



## Image Pair 33

Cannabis Image

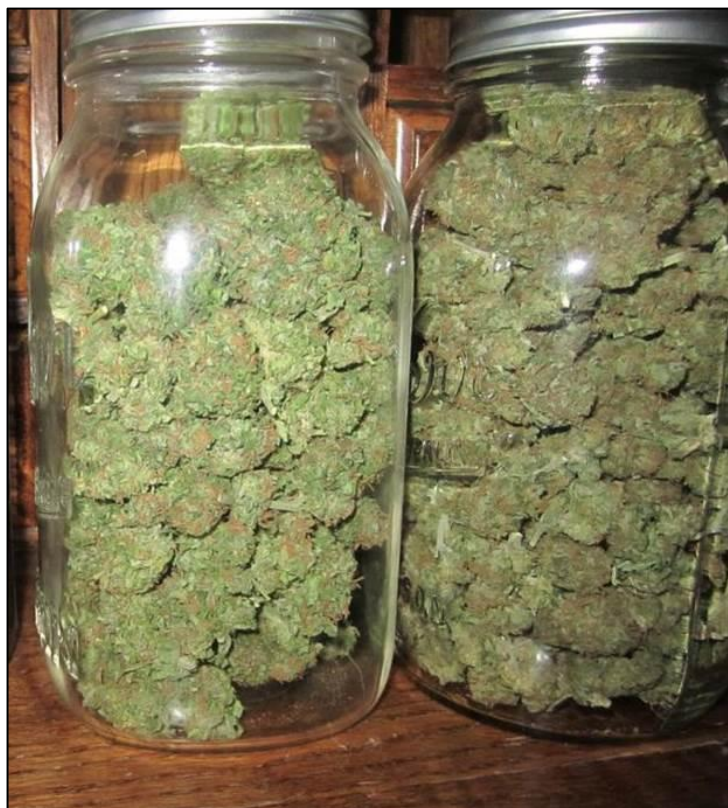

Control Image

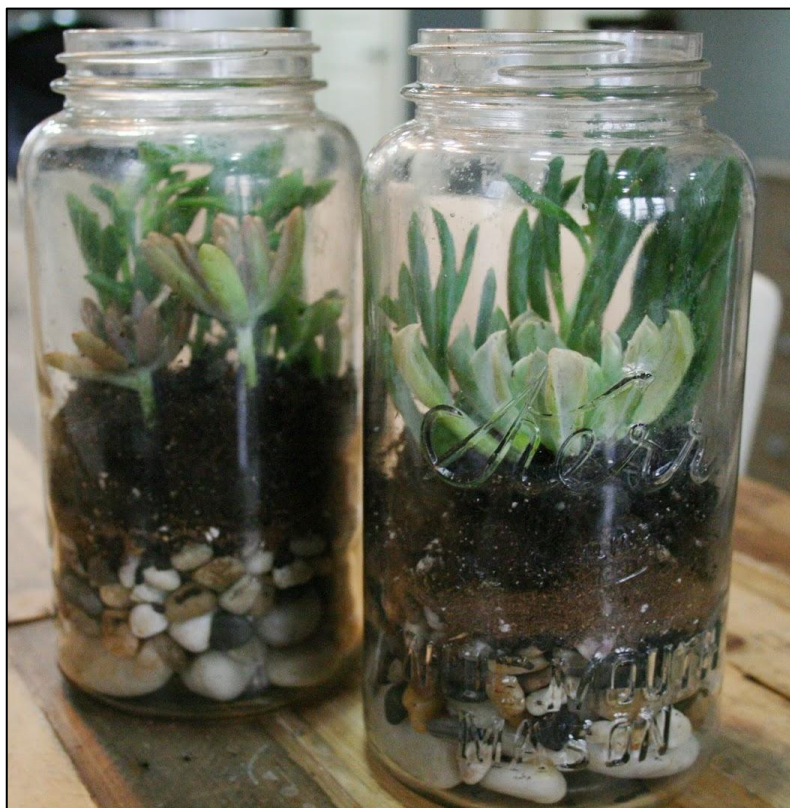

Image Pair 34

Cannabis Image

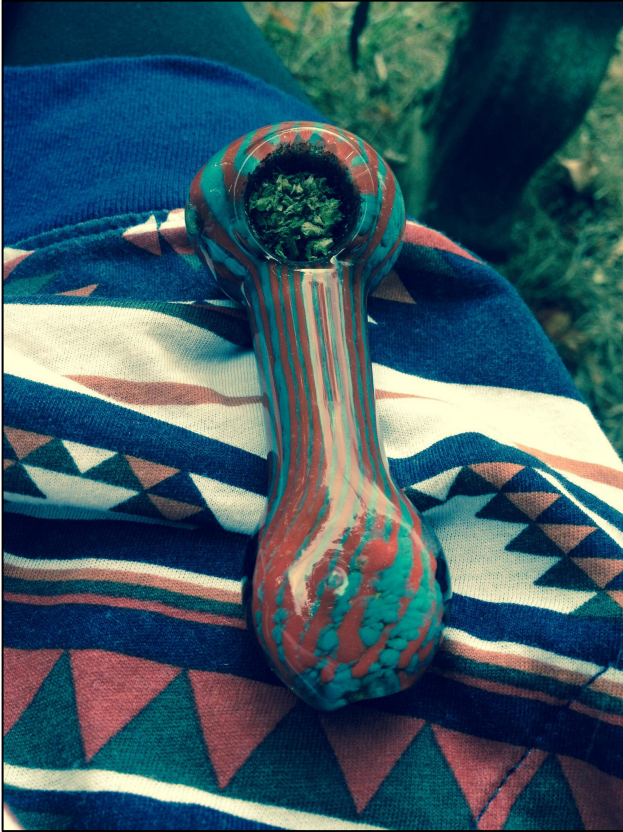

Control Image

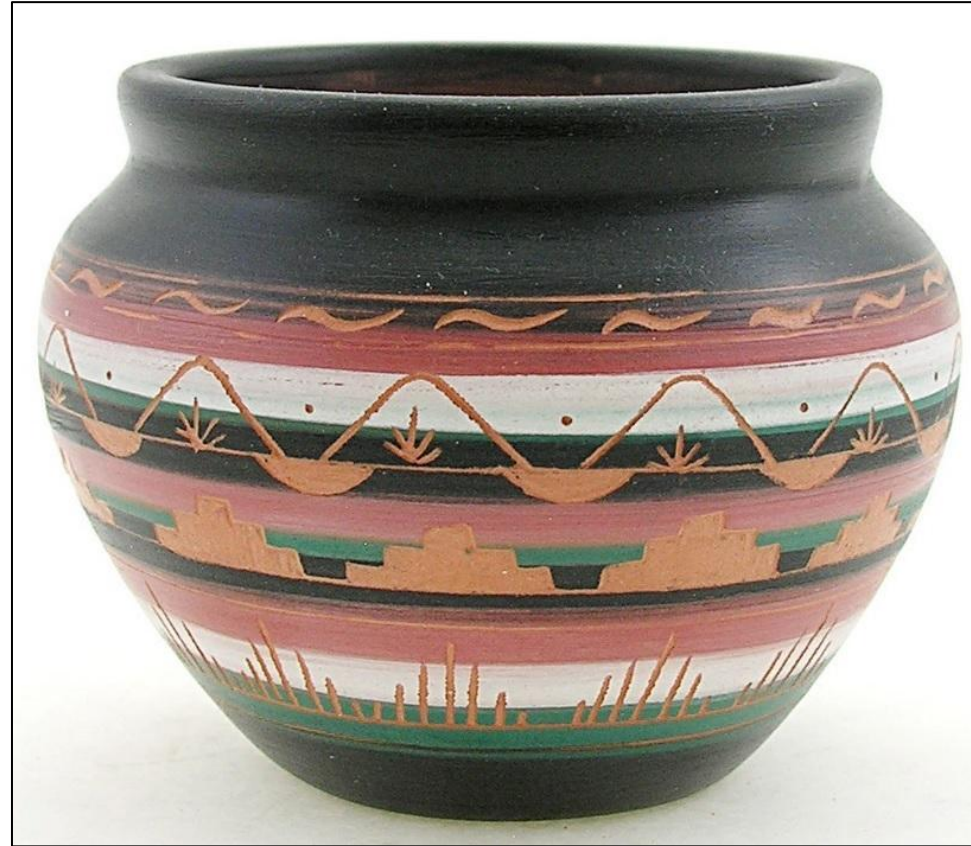

## Image Pair 35

Cannabis Image

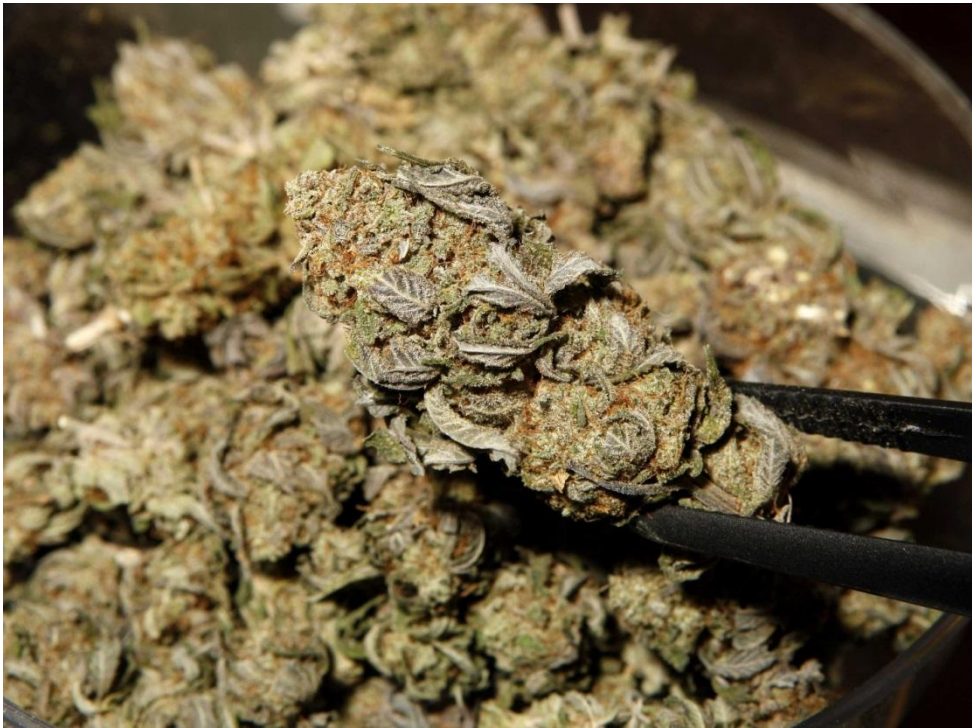

Control Image

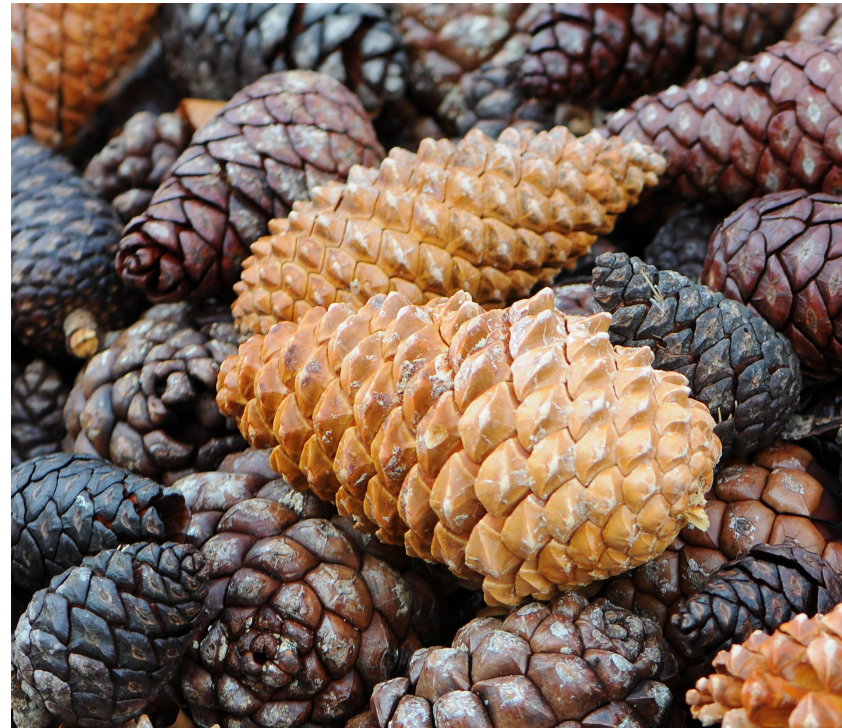

Image Pair 36

Cannabis Image

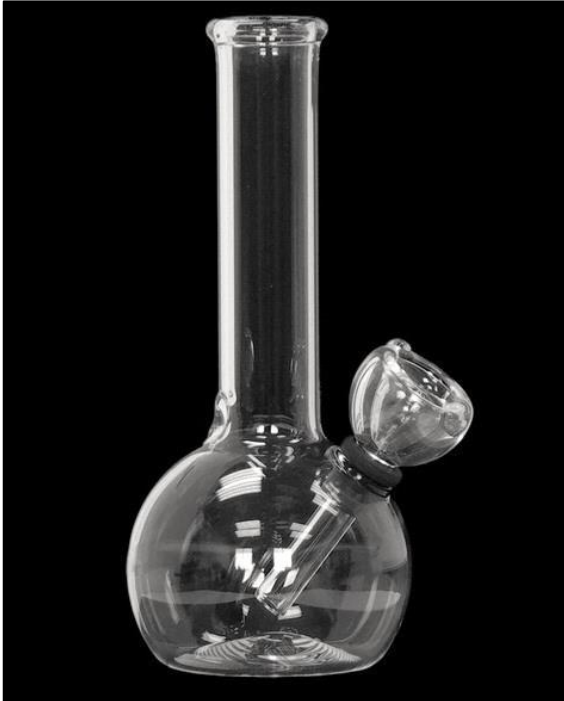

Control Image

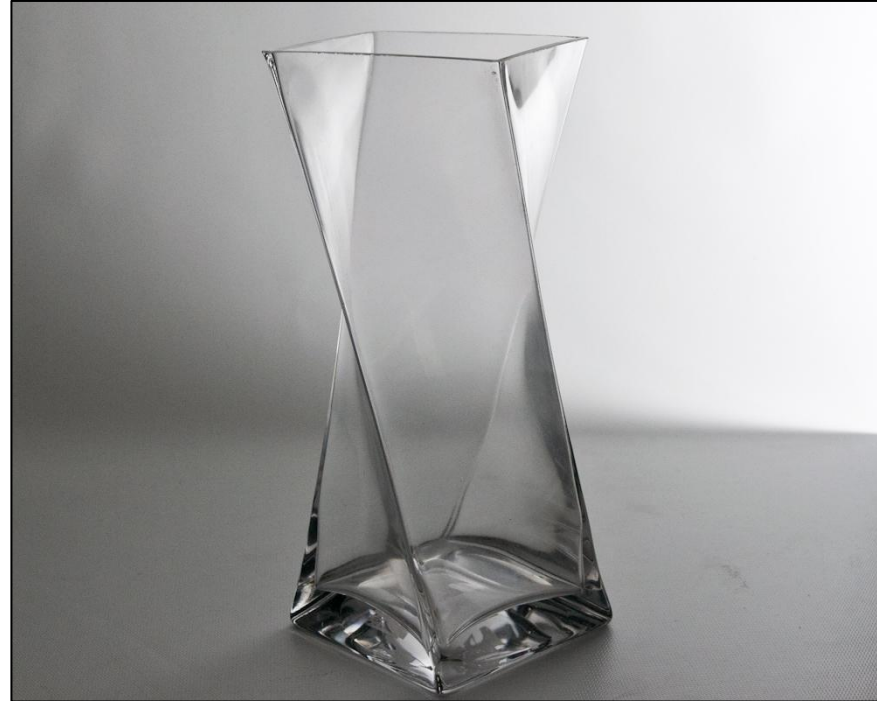

Supplement: NIHMS1000518-supplement-Supplement_2.pdf [file NIHMS1000518-supplement-Supplement_2.pdf]
